# Supplementary material for: Studying dietary intake in daily life through multilevel two-part modelling: a novel analytical approach and its practical application
Source: Springer Nature journal article supplement (doi:10.1186/s12966-021-01187-8), 2021-09-27
Supplement: MOESM6 [file 12966_2021_1187_MOESM6_ESM.pdf]

## Additional file 6. Model Summaries

Figure 1. Model summary of the Random Intercept Model with Level-2 predictor *gender*

```

Family: hurdle_gamma
Links: mu = log; shape = identity; hu = logit
Formula: energy_intake ~ 1 + gender + (1 | x | ID)
         hu ~ 1 + gender + (1 | x | ID)
Data: data (Number of observations: 2044)
Samples: 4 chains, each with iter = 2000; warmup = 1000; thin = 1;
         total post-warmup samples = 4000

Group-Level Effects:
~ID (Number of levels: 99)

```

|                              | Estimate | Est.Error                 | 1-95% CI | u-95% CI | Rhat | Bulk_ESS | Tail_ESS |
|------------------------------|----------|---------------------------|----------|----------|------|----------|----------|
| sd(Intercept)                | 0.12     | $(\sqrt{\sigma^2_{u_1}})$ | 0.05     | 0.01     | 0.22 | 1.00     | 795      |
| sd(hu_Intercept)             | 0.23     | $(\sqrt{\sigma^2_{u_0}})$ | 0.08     | 0.04     | 0.38 | 1.00     | 831      |
| cor(Intercept, hu_Intercept) | 0.71     | $(\rho_{u_1 u_0})$        | 0.34     | -0.34    | 0.99 | 1.00     | 704      |

```

Population-Level Effects:

```

|              | Estimate | Est.Error      | 1-95% CI | u-95% CI | Rhat  | Bulk_ESS | Tail_ESS |
|--------------|----------|----------------|----------|----------|-------|----------|----------|
| Intercept    | 6.27     | $(\beta_{10})$ | 0.06     | 6.14     | 6.39  | 1.00     | 4889     |
| hu_Intercept | -0.05    | $(\beta_{00})$ | 0.09     | -0.23    | 0.13  | 1.00     | 4074     |
| gender       | -0.25    | $(\beta_{11})$ | 0.07     | -0.39    | -0.10 | 1.00     | 4855     |
| hu_gender    | -0.02    | $(\beta_{01})$ | 0.11     | -0.24    | 0.20  | 1.00     | 4241     |

```

Family Specific Parameters:

```

|       | Estimate | Est.Error | 1-95% CI | u-95% CI | Rhat | Bulk_ESS | Tail_ESS |
|-------|----------|-----------|----------|----------|------|----------|----------|
| shape | 0.94     | 0.04      | 0.87     | 1.02     | 1.00 | 5706     | 2843     |

Samples were drawn using sampling(NUTS). For each parameter, Bulk\_ESS and Tail\_ESS are effective sample size measures, and Rhat is the potential scale reduction factor on split chains (at convergence, Rhat = 1).

Figure 2. Model summary of the Random Slope Model with Level-1 predictor energetic arousal (EA)

```

Family: hurdle_gamma
Links: mu = log; shape = identity; hu = logit
Formula: energy_intake ~ 1 + gender + EA + (1 + EA | x | ID)
        hu ~ 1 + EA + (1 + EA | x | ID)
Data: data (Number of observations: 2025)
Samples: 4 chains, each with iter = 2000; warmup = 1000; thin = 1;
        total post-warmup samples = 4000

Group-Level Effects:
~ID (Number of levels: 99)

```

|                              | Estimate | Est.Error                    | l-95% CI | u-95% CI   | Rhat | Bulk_ESS | Tail_ESS |
|------------------------------|----------|------------------------------|----------|------------|------|----------|----------|
| sd(Intercept)                | 0.11     | $(\sqrt{\sigma^2_{u_1}})$    | 0.05     | 0.01 0.21  | 1.00 | 801      | 611      |
| sd(EA)                       | 0.02     | $(\sqrt{\sigma^2_{u_{12}}})$ | 0.02     | 0.00 0.06  | 1.00 | 2144     | 1789     |
| sd(hu_Intercept)             | 0.22     | $(\sqrt{\sigma^2_{u_0}})$    | 0.08     | 0.04 0.37  | 1.00 | 1098     | 950      |
| sd(hu_EA)                    | 0.11     | $(\sqrt{\sigma^2_{u_{01}}})$ | 0.04     | 0.02 0.18  | 1.00 | 1154     | 1608     |
| cor(Intercept, EA)           | 0.00     | $(\rho_{u_1 u_{12}})$        | 0.45     | -0.80 0.81 | 1.00 | 4486     | 2421     |
| cor(Intercept, hu_Intercept) | 0.56     | $(\rho_{u_1 u_0})$           | 0.34     | -0.36 0.95 | 1.00 | 843      | 899      |
| cor(EA, hu_Intercept)        | 0.04     | $(\rho_{u_{12} u_0})$        | 0.43     | -0.78 0.80 | 1.00 | 1744     | 2524     |
| cor(Intercept, hu_EA)        | 0.36     | $(\rho_{u_1 u_{01}})$        | 0.37     | -0.51 0.89 | 1.00 | 1177     | 1124     |
| cor(EA, hu_EA)               | -0.05    | $(\rho_{u_{12} u_{01}})$     | 0.44     | -0.81 0.78 | 1.00 | 1463     | 2423     |
| cor(hu_Intercept, hu_EA)     | 0.24     | $(\rho_{u_0 u_{01}})$        | 0.34     | -0.50 0.82 | 1.00 | 2347     | 2418     |

```

Population-Level Effects:

```

|              | Estimate | Est.Error      | l-95% CI | u-95% CI    | Rhat | Bulk_ESS | Tail_ESS |
|--------------|----------|----------------|----------|-------------|------|----------|----------|
| Intercept    | 6.24     | $(\beta_{10})$ | 0.06     | 6.12 6.36   | 1.00 | 4883     | 3222     |
| hu_Intercept | -0.06    | $(\beta_{00})$ | 0.05     | -0.16 0.04  | 1.00 | 4046     | 2537     |
| gender       | -0.22    | $(\beta_{11})$ | 0.07     | -0.37 -0.08 | 1.00 | 4479     | 2810     |
| EA           | 0.02     | $(\beta_{12})$ | 0.02     | -0.01 0.05  | 1.00 | 5552     | 3172     |
| hu_EA        | -0.04    | $(\beta_{01})$ | 0.03     | -0.09 0.01  | 1.00 | 5232     | 3301     |

```

Family Specific Parameters:

```

|       | Estimate | Est.Error | l-95% CI | u-95% CI | Rhat | Bulk_ESS | Tail_ESS |
|-------|----------|-----------|----------|----------|------|----------|----------|
| shape | 0.94     | 0.04      | 0.88     | 1.02     | 1.00 | 5073     | 2594     |

Samples were drawn using sampling(NUTS). For each parameter, Bulk\_ESS and Tail ESS are effective sample size measures, and Rhat is the potential scale reduction factor on split chains (at convergence, Rhat = 1).
