# Supplementary material for: Studying dietary intake in daily life through multilevel two-part modelling: a novel analytical approach and its practical application
Source: Int J Behav Nutr Phys Act. 2021 Sep 27;18:130. doi: 10.1186/s12966-021-01187-8 (PMC8477527; doi:10.1186/s12966-021-01187-8)
Supplement: Supplementary file 2 — Additional file 2. Dataset. [file 12966_2021_1187_MOESM2_ESM.csv]

ID	alarm	day	time	energy_intake	gender	EA
1	1	1	9.38	0	1	5.04545454545454
1	2	1	10.67	7.5	1	3.04545454545454
1	3	1	11.88	1894.4	1	4.04545454545454
1	4	1	13.68	5	1	2.04545454545454
1	5	1	16.58	2.5	1	-2.95454545454546
1	6	1	17.88	2.5	1	1.04545454545454
1	7	1	19.58	330.37	1	5.04545454545454
1	8	1	20.8	0	1
1	9	2	8	253.88	1	4.04545454545454
1	10	2	12.82	407.3	1	3.04545454545454
1	11	2	14.43	6	1	2.04545454545454
1	12	2	16.7	0	1	-1.95454545454546
1	13	2	18.2	2190.5	1	3.04545454545454
1	14	2	19.87	6	1	-0.954545454545455
1	15	2	21.1	2.5	1	-2.95454545454546
1	16	3	9.03	0	1	-2.95454545454546
1	17	3	10.15	2.5	1	-2.95454545454546
1	18	3	13.07	32.5	1	-4.95454545454546
1	19	3	14.32	2060.65	1	-4.95454545454546
1	20	3	15.82	2.5	1	-2.95454545454546
1	21	3	16.9	2.5	1	-2.95454545454546
1	22	3	18.92	1254.55	1	0.045454545454545
1	23	3	21.6	2.5	1	-1.95454545454546
2	1	1	8.88	142.75	1	0.0833333333333339
2	2	1	10.37	96.8	1	0.0833333333333339
2	3	1	13.2	0	1	0.0833333333333339
2	4	1	14.3	0	1	0.0833333333333339
2	5	1	15.72	0	1	0.0833333333333339
2	6	1	17.4	142.75	1	0.0833333333333339
2	7	1	20.2	0	1	-2.91666666666667
2	8	1	21.55	0	1	0.0833333333333339
2	9	2	8.55	131.5	1	1.08333333333333
2	10	2	10.43	97.65	1	0.0833333333333339
2	11	2	12.13	538.35	1	0.0833333333333339
2	12	2	14.53	0	1	0.0833333333333339
2	13	2	16.18	0	1	0.0833333333333339
2	14	2	17.22	0	1	2.08333333333333
2	15	2	19.37	707.74	1	-1.91666666666667
2	16	2	21.98	0	1	0.0833333333333339
2	17	3	9.45	228.3	1	0.0833333333333339
2	18	3	10.63	770.16	1	0.0833333333333339
2	19	3	12.72	0	1	0.0833333333333339
2	20	3	14.22	82	1	0.0833333333333339
2	21	3	16.68	0	1	0.0833333333333339
2	22	3	18.65	714.5	1	0.0833333333333339
2	23	3	19.47	1134.51	1	0.0833333333333339
2	24	3	21.25	0	1	0.0833333333333339
3	1	1	9.12	0	0	-4.63636363636364
3	2	1	11.02	885.6	0	-1.63636363636364
3	3	1	12.28	60	0	0.363636363636363
3	4	1	14	145.8	0	4.36363636363636
3	5	1	15.75	94	0	4.36363636363636
3	6	1	18.13	1874.65	0
3	7	1	20.03	0	0	1.36363636363636
3	8	1	22	0	0	-0.636363636363637
3	9	2	9.57	506.1	0	-3.63636363636364
3	10	2	11.25	0	0	-2.63636363636364
3	11	2	12.55	0	0	3.36363636363636
3	12	2	15.07	0	0	0.363636363636363
3	13	2	16.87	145.8	0	1.36363636363636
3	14	2	18.5	0	0	-1.63636363636364
3	15	2	19.52	1753.96	0	1.36363636363636
3	16	2	21.7	0	0
3	17	3	9.48	0	0	-5.63636363636364
3	18	3	11.1	0	0	-1.63636363636364
3	19	3	12.08	742	0	-1.63636363636364
3	20	3	15.03	0	0	2.36363636363636
3	21	3	15.93	0	0	1.36363636363636
3	22	3	17.75	0	0	0.363636363636363
3	23	3	19.9	1356.58	0	2.36363636363636
3	24	3	21.57	0	0	0.363636363636363
4	1	1	9.53	0	1	2.60869565217391
4	2	1	10.77	142.4	1	2.60869565217391
4	3	1	12.28	831.65	1	2.60869565217391
4	4	1	14.9	284.8	1	2.60869565217391
4	5	1	16.28	110.7	1	-1.39130434782609
4	6	1	17.42	0	1	-3.39130434782609
4	7	1	22.02	0	1	-0.391304347826088
4	8	2	8.92	0	1	0.608695652173912
4	9	2	10.32	142.4	1	1.60869565217391
4	10	2	11.92	408.3	1	0.608695652173912
4	11	2	14.43	0	1	-0.391304347826088
4	12	2	16.05	131.6	1	0.608695652173912
4	13	2	17.48	0	1	-2.39130434782609
4	14	2	18.63	0	1	-0.391304347826088
4	15	2	21.8	0	1	-3.39130434782609
4	16	3	8.4	0	1	1.60869565217391
4	17	3	10.82	1232.86	1	1.60869565217391
4	18	3	13.13	214.4	1	0.608695652173912
4	19	3	14.13	0	1	-2.39130434782609
4	20	3	16.12	0	1	1.60869565217391
4	21	3	17.18	241.4	1	-1.39130434782609
4	22	3	19.17	0	1	-0.391304347826088
4	23	3	20.37	173	1	-3.39130434782609
5	1	1	8.55	0	0	-0.699999999999999
5	2	1	13.22	0	0	2.3
5	3	1	14	284.8	0	2.3
5	4	1	16.48	0	0	0.300000000000001
5	5	1	18	427.83	0	-2.7
5	6	1	19.28	99	0	-1.7
5	7	1	21.53	136	0	-2.7
5	8	2	10.1	590.5	0	4.3
5	9	2	12.13	287.8	0	2.3
5	10	2	14.8	0	0	0.300000000000001
5	11	2	16.53	510	0	-1.7
5	12	2	18.45	0	0	-1.7
5	13	2	20.2	0	0	2.3
5	14	2	21.33	354	0	-6.7
5	15	3	10.95	368.4	0	3.3
5	16	3	12.77	696.5	0	2.3
5	17	3	15.28	219	0	-0.699999999999999
5	18	3	17.43	0	0	-0.699999999999999
5	19	3	19.43	393.75	0	1.3
5	20	3	20.87	0	0	-1.7
6	1	1	8.05	0	0	-1.46153846153846
6	2	1	10.9	508.5	0	3.53846153846154
6	3	1	12.33	0	0	2.53846153846154
6	4	1	17.9	885.5	0	0.538461538461538
6	5	1	21.52	0	0	-0.461538461538462
6	6	2	16.7	272.3	0	3.53846153846154
6	7	2	18	355.5	0	-0.461538461538462
6	8	2	19.42	99	0	-3.46153846153846
6	9	2	21.08	0	0	-0.461538461538462
6	10	3	16.68	1108.7	0	0.538461538461538
6	11	3	18.45	99	0	0.538461538461538
6	12	3	20.1	0	0	-0.461538461538462
6	13	3	21.4	0	0	-4.46153846153846
7	1	1	8.93	514.1	1	0.458333333333334
7	2	1	10.78	1.5	1	-0.541666666666666
7	3	1	12.02	681.944	1	-0.541666666666666
7	4	1	13.5	405.75	1	0.458333333333334
7	5	1	15.83	0	1	-1.54166666666667
7	6	1	17.13	827.6792	1	-1.54166666666667
7	7	1	20.18	0	1	-1.54166666666667
7	8	1	21.5	0	1	-1.54166666666667
7	9	2	8.9	426.25	1	2.45833333333333
7	10	2	10.98	0	1	-0.541666666666666
7	11	2	12.27	194.62	1	-2.54166666666667
7	12	2	13.32	0	1	0.458333333333334
7	13	2	16.55	0	1	-2.54166666666667
7	14	2	18.08	0	1	1.45833333333333
7	15	2	19.27	0	1	1.45833333333333
7	16	2	20.33	1150.76	1	1.45833333333333
7	17	3	9.32	222.407142857143	1	-0.541666666666666
7	18	3	11.43	0	1	0.458333333333334
7	19	3	12.62	0	1	1.45833333333333
7	20	3	13.77	445.859285714286	1	1.45833333333333
7	21	3	15.2	53.4	1	0.458333333333334
7	22	3	18.27	319.14	1	0.458333333333334
7	23	3	19.5	0	1	0.458333333333334
7	24	3	20.55	0	1	0.458333333333334
8	1	1	8.88	0	1	-0.35
8	2	1	11.05	198.7	1
8	3	1	13.07	840.63	1	3.65
8	4	1	14.12	0	1	2.65
8	5	1	15.2	0	1	2.65
8	6	1	19.73	0	1	-4.35
8	7	1	21.47	0	1	-5.35
8	8	2	8.1	288.5	1	-0.35
8	9	2	10.62	214.4	1	0.65
8	10	2	12.92	1675.17	1	1.65
8	11	2	14.47	0	1	0.65
8	12	2	15.65	0	1	-1.35
8	13	2	16.93	0	1	0.65
8	14	2	19.75	128.7	1	2.65
8	15	2	21.53	0	1	-2.35
8	16	3	9.28	331.5	1	-2.35
8	17	3	10.92	0	1	0.65
8	18	3	13.17	946.9	1	-1.35
8	19	3	14.75	91.5	1	2.65
8	20	3	16.58	0	1	-1.35
8	21	3	18.03	0	1	0.65
9	1	1	9.95	0	1	1.45833333333333
9	2	1	10.7	100.174285714286	1	1.45833333333333
9	3	1	11.98	267.131428571429	1	0.458333333333334
9	4	1	14.37	96.4457142857143	1	-0.541666666666666
9	5	1	15.45	94	1	-0.541666666666666
9	6	1	17.83	149.056	1	2.45833333333333
9	7	1	19.45	0	1	-2.54166666666667
9	8	1	20.63	0	1	-2.54166666666667
9	9	2	8.15	94	1	-6.54166666666667
9	10	2	11.17	99.2	1	-0.541666666666666
9	11	2	13.22	193.2	1	-0.541666666666666
9	12	2	14.63	127.8	1	0.458333333333334
9	13	2	15.98	0	1	1.45833333333333
9	14	2	17.4	1100.0564	1	1.45833333333333
9	15	2	19.68	0	1	3.45833333333333
9	16	2	21.57	0	1	-0.541666666666666
9	17	3	8.37	193.2	1	-5.54166666666667
9	18	3	11.32	0	1	3.45833333333333
9	19	3	12.45	499.712	1	0.458333333333334
9	20	3	14.52	70.25	1	1.45833333333333
9	21	3	16	142.35	1	1.45833333333333
9	22	3	18.25	0	1	0.458333333333334
9	23	3	19.22	631.73	1	0.458333333333334
9	24	3	21.75	0	1	-0.541666666666666
10	1	1	9.12	4	1	-2.59090909090909
10	2	1	10.75	4	1	1.40909090909091
10	3	1	12.95	0	1	1.40909090909091
10	4	1	14.1	0	1	2.40909090909091
10	5	1	16.47	162.5	1	2.40909090909091
10	6	1	17.88	650	1	2.40909090909091
10	7	1	19.3	323.8	1	0.409090909090908
10	8	1	21.47	0	1	-2.59090909090909
10	9	2	9.1	0	1	-0.590909090909092
10	10	2	10.52	0	1	1.40909090909091
10	11	2	11.65	0	1	0.409090909090908
10	12	2	13.38	12	1	-0.590909090909092
10	13	2	17.47	0	1	0.409090909090908
10	14	2	18.5	0	1	1.40909090909091
10	15	2	20.75	709.55	1	2.40909090909091
10	16	3	8.48	439.93	1	-2.59090909090909
10	17	3	10.83	0	1	0.409090909090908
10	18	3	13.23	0	1	0.409090909090908
10	19	3	14.63	184.8	1	1.40909090909091
10	20	3	16.68	0	1	-3.59090909090909
10	21	3	19.95	0	1	-2.59090909090909
10	22	3	21.68	0	1	-3.59090909090909
11	1	1	9.45	0	1	0.444444444444445
11	2	1	13.4	0	1	0.444444444444445
11	3	1	14.42	0	1	1.44444444444444
11	4	1	16.73	317.85	1	-0.555555555555555
11	5	1	18.73	817.76	1	-1.55555555555556
11	6	1	19.52	0	1	-2.55555555555556
11	7	1	21.45	0	1	-3.55555555555556
11	8	2	10.02	0	1	-0.555555555555555
11	9	2	11.53	555.35	1	-0.555555555555555
11	10	2	13.47	0	1	0.444444444444445
11	11	2	18.23	0	1	0.444444444444445
11	12	2	20.32	391.9775	1	1.44444444444444
11	13	2	21.65	0	1	2.44444444444444
11	14	3	10.2	901.3	1	0.444444444444445
11	15	3	12.5	0	1	2.44444444444444
11	16	3	14.77	0	1	2.44444444444444
11	17	3	19.75	470.91	1	0.444444444444445
11	18	3	22.28	0	1	-3.55555555555556
12	1	1	8.6	323.7	1	-0.625
12	2	1	11.38	0	1	2.375
12	3	1	12.63	720.47	1	5.375
12	4	1	14.4	0	1	2.375
12	5	1	16.43	0	1	-0.625
12	6	1	18.1	231.85	1	-3.625
12	7	1	19.5	64.5	1	-3.625
12	8	1	21.85	0	1	-1.625
12	9	2	9.15	323.7	1	-1.625
12	10	2	10.35	0	1	1.375
12	11	2	11.78	0	1	2.375
12	12	2	14.78	91.5	1	-0.625
12	13	2	16.07	0	1	-0.625
12	14	2	17.92	0	1	0.375
12	15	2	19.35	0	1	-1.625
12	16	2	21	1132.33	1	-0.625
12	17	3	8.45	323.7	1	-1.625
12	18	3	10.15	0	1	2.375
12	19	3	11.7	0	1	2.375
12	20	3	13.77	683.045	1	-1.625
12	21	3	16.78	0	1	-2.625
12	22	3	18.28	0	1	-0.625
12	23	3	19.38	686.255	1	1.375
12	24	3	21.33	0	1	1.375
13	1	1	8.63	183	1	-1.04166666666667
13	2	1	10.35	0	1	-1.04166666666667
13	3	1	12.52	23.25	1	-1.04166666666667
13	4	1	14.82	0	1	-1.04166666666667
13	5	1	15.9	91.5	1	-0.041666666666667
13	6	1	18.33	524.18	1	-0.041666666666667
13	7	1	20.18	0	1	-1.04166666666667
13	8	1	21.92	0	1	-1.04166666666667
13	9	2	8.93	269.64	1	0.958333333333333
13	10	2	11.47	0	1	1.95833333333333
13	11	2	12.47	0	1	1.95833333333333
13	12	2	15.03	0	1	-1.04166666666667
13	13	2	16.55	0	1	-1.04166666666667
13	14	2	17.77	0	1	0.958333333333333
13	15	2	20.03	116	1	1.95833333333333
13	16	2	21.98	0	1	-1.04166666666667
13	17	3	8.88	734.85	1	0.958333333333333
13	18	3	11.23	99	1	-0.041666666666667
13	19	3	13.23	200	1	-0.041666666666667
13	20	3	14.52	162.6	1	0.958333333333333
13	21	3	16.08	0	1	-0.041666666666667
13	22	3	18.5	1111.4	1	-0.041666666666667
13	23	3	20.17	8	1	-0.041666666666667
13	24	3	21.77	107	1	-0.041666666666667
14	1	1	9.32	2	1	-3.47826086956522
14	2	1	10.67	0	1	-0.478260869565217
14	3	1	12.33	447.6	1	1.52173913043478
14	4	1	14.3	20.25	1	1.52173913043478
14	5	1	15.32	0	1	4.52173913043478
14	6	1	17.35	2	1	-1.47826086956522
14	7	1	19.08	0	1	-2.47826086956522
14	8	1	21.77	0	1	-4.47826086956522
14	9	2	8.95	0	1	1.52173913043478
14	10	2	11.25	1207.8	1	0.521739130434783
14	11	2	12.95	0	1	1.52173913043478
14	12	2	14.62	0	1	-2.47826086956522
14	13	2	15.48	0	1	-1.47826086956522
14	14	2	18.43	127.124	1	-2.47826086956522
14	15	2	19.68	870.824	1	2.52173913043478
14	16	2	21.6	238	1	3.52173913043478
14	17	3	8.05	0	1	-2.47826086956522
14	18	3	10.55	110	1	-1.47826086956522
14	19	3	12.92	0	1	-0.478260869565217
14	20	3	14.97	0	1	0.521739130434783
14	21	3	16.62	372.5	1
14	22	3	17.8	573.78	1	0.521739130434783
14	23	3	19.33	0	1	1.52173913043478
14	24	3	20.8	185	1	3.52173913043478
15	1	1	9.32	0	1	-1.76923076923077
15	2	1	10.67	624.23	1
15	3	1	14.13	10.2	1	0.23076923076923
15	4	1	17.48	0	1	-0.76923076923077
15	5	1	19.07	313.4	1	-2.76923076923077
15	6	2	8.15	550.93	1	-0.76923076923077
15	7	2	10	355.25	1	3.23076923076923
15	8	2	15.65	0	1	2.23076923076923
15	9	3	9.43	359.6	1	2.23076923076923
15	10	3	13.23	942.52	1	0.23076923076923
15	11	3	15.3	0	1	1.23076923076923
15	12	3	16.62	0	1	-3.76923076923077
15	13	3	18.1	258.35	1	-1.76923076923077
15	14	3	21.75	0	1	2.23076923076923
16	1	1	8.4	206.8	1	-3.125
16	2	1	9.98	0	1	-0.125
16	3	1	12.08	0	1	1.875
16	4	1	14.67	501.123094736843	1	2.875
16	5	1	15.78	0	1	1.875
16	6	1	18.83	0	1	-4.125
16	7	1	19.72	0	1	-3.125
16	8	1	21.15	0	1	0.875
16	9	2	9.7	0	1	-0.125
16	10	2	11.18	1658.83552	1	1.875
16	11	2	12.9	0	1	1.875
16	12	2	14.43	297	1	1.875
16	13	2	15.47	629	1	0.875
16	14	2	16.97	0	1	-0.125
16	15	2	18.9	407	1	-0.125
16	16	2	21.55	216	1	0.875
16	17	3	8.47	0	1	1.875
16	18	3	10.08	1100.56154736842	1	1.875
16	19	3	13.18	0	1	-2.125
16	20	3	14.58	0	1	1.875
16	21	3	15.72	0	1	-2.125
16	22	3	16.9	0	1	-6.125
16	23	3	18.92	1513.6	1	1.875
16	24	3	21	0	1	-1.125
17	1	1	8.57	0	1	-0.291666666666666
17	2	1	11.15	372.75	1	3.70833333333333
17	3	1	13.18	0	1	4.70833333333333
17	4	1	14.82	1338.48	1	3.70833333333333
17	5	1	16.45	0	1	4.70833333333333
17	6	1	18.47	142.5	1	-4.29166666666667
17	7	1	20.02	873.08	1	-4.29166666666667
17	8	1	21.15	288	1	-4.29166666666667
17	9	2	8.35	230.4	1	0.708333333333334
17	10	2	9.9	3	1	-5.29166666666667
17	11	2	11.68	1366.98	1	0.708333333333334
17	12	2	14.08	0	1	2.70833333333333
17	13	2	16.6	0	1	2.70833333333333
17	14	2	18.42	0	1	4.70833333333333
17	15	2	19.68	136.32	1	2.70833333333333
17	16	2	21.92	532.58	1	-0.291666666666666
17	17	3	9.02	0	1	-3.29166666666667
17	18	3	10.52	992.86	1	-3.29166666666667
17	19	3	13.2	0	1	-0.291666666666666
17	20	3	14.9	1719.57	1	-1.29166666666667
17	21	3	16.7	0	1	-3.29166666666667
17	22	3	17.72	0	1	0.708333333333334
17	23	3	19.47	654.93	1	-1.29166666666667
17	24	3	21.98	0	1	-0.291666666666666
18	1	1	9.03	18.3	1	3.625
18	2	1	11.2	0	1	-4.375
18	3	1	12.35	376.8816	1	0.625
18	4	1	14.25	0	1	0.625
18	5	1	15.78	1242.226	1	0.625
18	6	1	18.1	298.248	1	-2.375
18	7	1	20.17	0	1	-3.375
18	8	1	21.55	0	1	-6.375
18	9	2	8.47	470.128	1	0.625
18	10	2	10.97	0	1	1.625
18	11	2	11.7	490.23	1	-1.375
18	12	2	14.08	130.53	1	1.625
18	13	2	15.72	36.6	1	-2.375
18	14	2	17.22	221.6	1	3.625
18	15	2	20.42	431.508864	1	1.625
18	16	2	21.93	0	1	-5.375
18	17	3	8.92	475	1	1.625
18	18	3	11.5	40	1	3.625
18	19	3	12.82	480.331	1	-0.375
18	20	3	14.92	440.555	1	3.625
18	21	3	16.83	694.29	1	3.625
18	22	3	18.6	514.3	1	0.625
18	23	3	20.12	0	1	-0.375
18	24	3	21.22	120.8	1	-1.375
19	1	1	9.62	0	1	-5.43478260869565
19	2	1	11.32	279.9	1	-0.434782608695652
19	3	1	13.07	0	1	2.56521739130435
19	4	1	14.03	0	1	3.56521739130435
19	5	1	15.33	0	1	-0.434782608695652
19	6	1	17.92	1065.2	1	-0.434782608695652
19	7	1	19.9	0	1	3.56521739130435
19	8	1	21.22	0	1	0.565217391304348
19	9	2	8.17	326.35	1	-1.43478260869565
19	10	2	10.75	0	1	-1.43478260869565
19	11	2	11.8	0	1	1.56521739130435
19	12	2	13.55	446.15	1	-1.43478260869565
19	13	2	15.5	0	1	-0.434782608695652
19	14	2	17.65	1330.77	1	-1.43478260869565
19	15	2	20.22	145.7	1	-0.434782608695652
19	16	2	21.43	0	1	-1.43478260869565
19	17	3	8.38	0	1	-0.434782608695652
19	18	3	9.93	0	1	0.565217391304348
19	19	3	11.97	408.55	1	1.56521739130435
19	20	3	16.1	0	1	-1.43478260869565
19	21	3	18.13	625.5	1	1.56521739130435
19	22	3	19.5	0	1	1.56521739130435
19	23	3	20.82	0	1	-0.434782608695652
20	1	1	8.87	0	1	-0.523809523809524
20	2	1	9.83	366.5	1	1.47619047619048
20	3	1	12.2	0	1	1.47619047619048
20	4	1	13.98	833.88	1	0.476190476190476
20	5	1	18.02	0	1	-2.52380952380952
20	6	1	21.5	714.05	1	-4.52380952380952
20	7	2	8.9	393.2	1	3.47619047619048
20	8	2	13.02	524.387	1	-0.523809523809524
20	9	2	15.1	0	1	0.476190476190476
20	10	2	15.98	0	1	-0.523809523809524
20	11	2	17.42	0	1	-0.523809523809524
20	12	2	18.98	0	1	-1.52380952380952
20	13	2	20.58	652.2	1	0.476190476190476
20	14	3	8.62	357.05	1	2.47619047619048
20	15	3	10.35	0	1	3.47619047619048
20	16	3	12.6	0	1	2.47619047619048
20	17	3	14.53	699	1	-0.523809523809524
20	18	3	15.67	0	1	-1.52380952380952
20	19	3	17.47	252	1	-2.52380952380952
20	20	3	19.52	0	1	-2.52380952380952
20	21	3	21.45	0	1	1.47619047619048
21	1	1	9.23	0	0	0.125
21	2	1	10.62	901.4	0	3.125
21	3	1	12.53	0	0	-0.875
21	4	1	14.87	0	0	-4.875
21	5	1	16.35	594.76	0	-0.875
21	6	1	18.62	0	0	-0.875
21	7	1	20.22	644.7	0	-0.875
21	8	1	21.67	0	0	-1.875
21	9	2	9.68	0	0	1.125
21	10	2	11.33	628.1	0	1.125
21	11	2	12.98	0	0	1.125
21	12	2	14.3	182.8	0	-1.875
21	13	2	15.53	427	0	-1.875
21	14	2	18.3	157.5	0	-0.875
21	15	2	19.5	2901.2	0	3.125
21	16	2	21.3	0	0	2.125
21	17	3	9.63	0	0	1.125
21	18	3	10.83	0	0	1.125
21	19	3	11.93	867.55	0	1.125
21	20	3	14.57	0	0	2.125
21	21	3	16.08	0	0	-1.875
21	22	3	17.73	0	0	-1.875
21	23	3	19.07	1269.32	0	3.125
21	24	3	21.13	0	0	-1.875
22	1	1	10.72	572.58	1	2.1875
22	2	1	12.5	0	1	1.1875
22	3	1	13.68	0	1	1.1875
22	4	1	16.48	112.5	1	1.1875
22	5	1	18.3	560.98	1	0.1875
22	6	1	19.68	0	1	1.1875
22	7	1	21.33	0	1	1.1875
22	8	2	12.95	1589.54	1	-4.8125
22	9	2	14.08	0	1	1.1875
22	10	2	15.55	124.5	1	-3.8125
22	11	2	20.37	0	1	-2.8125
22	12	3	8.4	810	1	-1.8125
22	13	3	10.02	0	1	-0.8125
22	14	3	14.33	54.67	1	1.1875
22	15	3	16.6	0	1	1.1875
22	16	3	18.35	1041.4	1	2.1875
23	1	1	8.97	0	0	2.52380952380952
23	2	1	10.77	615	0	0.523809523809524
23	3	1	12.92	0	0	0.523809523809524
23	4	1	14.38	0	0	0.523809523809524
23	5	1	16.2	0	0	1.52380952380952
23	6	1	17.15	383.7	0	1.52380952380952
23	7	1	20.15	0	0	-1.47619047619048
23	8	1	21.92	0	0	-3.47619047619048
23	9	2	9.43	0	0	2.52380952380952
23	10	2	11.35	210	0	0.523809523809524
23	11	2	13.23	0	0	-2.47619047619048
23	12	2	14.62	0	0	-0.476190476190476
23	13	2	16.18	0	0	-0.476190476190476
23	14	2	19.45	967.6	0	0.523809523809524
23	15	2	20.55	0	0	-0.476190476190476
23	16	3	8.8	0	0	1.52380952380952
23	17	3	12.7	0	0	0.523809523809524
23	18	3	14.32	674.7	0	-2.47619047619048
23	19	3	17.42	447	0	-1.47619047619048
23	20	3	18.77	0	0	0.523809523809524
23	21	3	21.15	0	0	-0.476190476190476
24	1	1	9.25	266.45	1	0.347826086956522
24	2	1	11.07	0	1	0.347826086956522
24	3	1	12.52	560.26	1	1.34782608695652
24	4	1	14.43	38	1	-2.65217391304348
24	5	1	16.35	522.5	1	1.34782608695652
24	6	1	18.32	270.61	1	1.34782608695652
24	7	1	19.85	38.1	1	0.347826086956522
24	8	1	21.75	0	1	-1.65217391304348
24	9	2	9.08	482.765	1	3.34782608695652
24	10	2	11.27	0	1	2.34782608695652
24	11	2	12.73	36.54	1	1.34782608695652
24	12	2	13.98	268.535	1	-0.652173913043478
24	13	2	16.58	0	1	-2.65217391304348
24	14	2	18.17	548.0991	1	1.34782608695652
24	15	2	20.2	0	1	-3.65217391304348
24	16	2	21.93	0	1	-4.65217391304348
24	17	3	9.12	424.805	1	2.34782608695652
24	18	3	10.02	0	1	2.34782608695652
24	19	3	11.75	173.1	1	4.34782608695652
24	20	3	13.75	0	1	1.34782608695652
24	21	3	18.05	0	1	-3.65217391304348
24	22	3	19.18	0	1	-2.65217391304348
24	23	3	20.53	244.2	1	-1.65217391304348
25	1	1	9.33	0	1	-1.42857142857143
25	2	1	10.47	0	1	0.571428571428571
25	3	1	12.68	389.5	1	1.57142857142857
25	4	1	14.87	228.91	1	0.571428571428571
25	5	1	16.4	0	1	-1.42857142857143
25	6	1	18.35	555.8	1	-0.428571428571429
25	7	1	21.2	0	1	2.57142857142857
25	8	2	14.55	0	1	0.571428571428571
25	9	2	17.38	0	1	-1.42857142857143
25	10	2	19.72	0	1	0.571428571428571
25	11	2	20.92	422.9	1	-2.42857142857143
25	12	3	8.28	464.8	1	-4.42857142857143
25	13	3	11.63	0	1	2.57142857142857
25	14	3	12.32	0	1	2.57142857142857
26	1	1	9.62	328.85	1	-0.0714285714285712
26	2	1	10.98	0	1	-0.0714285714285712
26	3	1	12.68	751.5	1	-0.0714285714285712
26	4	1	14.15	0	1	-0.0714285714285712
26	5	1	16.67	221.6	1	-0.0714285714285712
26	6	1	18.5	0	1	-1.07142857142857
26	7	1	19.88	444.05	1	0.928571428571429
26	8	1	21.43	0	1	0.928571428571429
26	9	2	8.3	0	1	-1.07142857142857
26	10	2	12.92	0	1	2.92857142857143
26	11	2	14.55	0	1	0.928571428571429
26	12	2	15.9	0	1	-1.07142857142857
26	13	2	17.77	0	1	-0.0714285714285712
26	14	2	21.37	0	1	-2.07142857142857
27	1	1	8.38	804.895	0	-0.0434782608695645
27	2	1	10.62	196	0	-0.0434782608695645
27	3	1	13.08	0	0	-2.04347826086956
27	4	1	14.97	0	0	-3.04347826086956
27	5	1	16.45	490.8	0	-5.04347826086956
27	6	1	17.88	398.7	0	-3.04347826086956
27	7	1	20.17	0	0	1.95652173913044
27	8	1	21.23	74	0	-0.0434782608695645
27	9	2	8.68	697.8	0	0.956521739130435
27	10	2	10.27	185	0	1.95652173913044
27	11	2	13.33	0	0	1.95652173913044
27	12	2	14.22	0	0	-0.0434782608695645
27	13	2	15.92	0	0	1.95652173913044
27	14	2	18.5	922.925	0	-0.0434782608695645
27	15	2	20.22	0	0	-0.0434782608695645
27	16	2	21.4	0	0	2.95652173913044
27	17	3	8.68	620.6	0	-4.04347826086956
27	18	3	11.32	0	0	-0.0434782608695645
27	19	3	14.75	741.755	0	3.95652173913044
27	20	3	16.17	0	0	3.95652173913044
27	21	3	17.6	0	0	1.95652173913044
27	22	3	19.5	697.75	0	-2.04347826086956
27	23	3	21.43	0	0	-2.04347826086956
28	1	1	9.2	0	1	2.54545454545454
28	2	1	14.53	212.55	1	0.545454545454545
28	3	1	16.63	456.775	1	0.545454545454545
28	4	1	18	48.8	1	-3.45454545454546
28	5	1	20.1	0	1	0.545454545454545
28	6	1	21.6	0	1	-2.45454545454546
28	7	2	8.93	341.6	1	2.54545454545454
28	8	2	11.27	0	1	-3.45454545454546
28	9	2	13.17	477.13	1	1.54545454545454
28	10	2	14.12	111.75	1	2.54545454545454
28	11	2	16.07	0	1	-3.45454545454546
28	12	2	18.3	642	1	2.54545454545454
28	13	2	20.1	0	1	0.545454545454545
28	14	2	21.18	0	1	-4.45454545454546
28	15	3	9.53	0	1	2.54545454545454
28	16	3	11.15	0	1	2.54545454545454
28	17	3	12.77	373.815	1	0.545454545454545
28	18	3	15.35	332.15	1	2.54545454545454
28	19	3	16.05	595	1	1.54545454545454
28	20	3	17.48	853.86	1	1.54545454545454
28	21	3	19.75	0	1	-3.45454545454546
28	22	3	20.85	0	1	-4.45454545454546
29	1	1	9	0	1	-2.7
29	2	1	11.4	996.33	1	-0.699999999999999
29	3	1	13.22	720.14	1	1.3
29	4	1	14.9	0	1	0.300000000000001
29	5	1	15.97	0	1	-0.699999999999999
29	6	1	17.77	0	1	0.300000000000001
29	7	1	20.07	559.76	1	-0.699999999999999
29	8	1	22.27	92.2	1	1.3
29	9	2	8.37	0	1	-1.7
29	10	2	10.62	180.05	1	-1.7
29	11	2	12.8	350.98	1	-0.699999999999999
29	12	2	15.63	710.29	1	2.3
29	13	2	16.85	0	1	0.300000000000001
29	14	2	19.92	0	1	2.3
29	15	2	21.57	0	1	1.3
29	16	3	8.85	364.73	1	-1.7
29	17	3	15.45	0	1	-1.7
29	18	3	18.32	0	1	0.300000000000001
29	19	3	20.07	1454.215	1	1.3
29	20	3	21.72	0	1	1.3
30	1	1	9.43	91.5	0	-1
30	2	1	11.08	772.63	0	1
30	3	1	14.25	0	0	1
30	4	1	17.9	0	0	0
30	5	2	8.6	1104.59	0	-4
30	6	2	11.48	0	0	1
30	7	2	13.25	350.1	0	2
30	8	2	14.73	287.2	0	1
30	9	2	15.93	0	0	1
30	10	2	17.48	393	0	2
30	11	2	18.93	0	0	0
30	12	2	21.62	0	0	-2
30	13	3	10.45	0	0	0
30	14	3	13.25	125.9	0	-3
30	15	3	14.38	0	0	-2
30	16	3	16.62	0	0	1
30	17	3	18.27	543.3	0	1
30	18	3	20.12	0	0	1
31	1	1	8.07	673.98	0	-1.04166666666667
31	2	1	11.4	0	0	0.958333333333334
31	3	1	12.73	0	0	1.95833333333333
31	4	1	14.87	0	0	3.95833333333333
31	5	1	16.3	402.15	0	-2.04166666666667
31	6	1	17.85	14.5	0	-2.04166666666667
31	7	1	20.2	182.9	0	-0.0416666666666661
31	8	1	21.28	0	0	0.958333333333334
31	9	2	8.1	0	0	0.958333333333334
31	10	2	10	464.4	0	-2.04166666666667
31	11	2	12.23	371.7	0	1.95833333333333
31	12	2	13.58	0	0	0.958333333333334
31	13	2	15.02	0	0	1.95833333333333
31	14	2	18.58	0	0	-0.0416666666666661
31	15	2	19.67	0	0	0.958333333333334
31	16	2	20.85	923.84	0	-4.04166666666667
31	17	3	8.23	327.45	0	2.95833333333333
31	18	3	10.3	0	0	-0.0416666666666661
31	19	3	12.88	413.7	0	0.958333333333334
31	20	3	14.97	171.6	0	-0.0416666666666661
31	21	3	16.05	0	0	-2.04166666666667
31	22	3	17.7	197.23	0	-3.04166666666667
31	23	3	19.63	1027.2	0	0.958333333333334
31	24	3	20.53	0	0	-3.04166666666667
32	1	1	12.58	0	0	-1.42857142857143
32	2	1	14.58	0	0	0.571428571428571
32	3	1	16.52	0	0	2.57142857142857
32	4	1	18.07	817.39	0	1.57142857142857
32	5	1	19.23	684	0	0.571428571428571
32	6	1	20.93	0	0	-1.42857142857143
32	7	2	10.97	780.2	0	-0.428571428571429
32	8	2	13.15	0	0	-0.428571428571429
32	9	2	14.62	582	0	1.57142857142857
32	10	2	16.88	99	0	-2.42857142857143
32	11	2	18.4	1028.1	0	-2.42857142857143
32	12	2	19.45	0	0	-2.42857142857143
32	13	2	20.55	0	0	-2.42857142857143
32	14	3	8.92	415	0	0.571428571428571
32	15	3	10.85	0	0	2.57142857142857
32	16	3	11.97	0	0	3.57142857142857
32	17	3	13.63	940.8	0	3.57142857142857
32	18	3	15.7	416.65	0	-1.42857142857143
32	19	3	16.98	180	0	-1.42857142857143
32	20	3	19.18	485	0	2.57142857142857
32	21	3	21.68	1005.4	0	-3.42857142857143
33	1	1	8.77	539.45	0	2.95833333333333
33	2	1	11.23	423.88	0	1.95833333333333
33	3	1	12.55	0	0	2.95833333333333
33	4	1	13.78	115.05	0	-1.04166666666667
33	5	1	16.1	768.38	0	2.95833333333333
33	6	1	18.02	0	0	3.95833333333333
33	7	1	19.55	94	0	3.95833333333333
33	8	1	21.2	2.5	0	3.95833333333333
33	9	2	8.53	250	0	-4.04166666666667
33	10	2	10.32	858.01	0	-4.04166666666667
33	11	2	12.2	0	0	-0.0416666666666661
33	12	2	13.62	857.5	0	-1.04166666666667
33	13	2	15.57	1.5	0	-0.0416666666666661
33	14	2	18.08	107.5	0	1.95833333333333
33	15	2	19.83	0	0	0.958333333333334
33	16	2	21.02	427	0	-1.04166666666667
33	17	3	9.3	442.6	0	0.958333333333334
33	18	3	11.2	20.825	0	-7.04166666666667
33	19	3	13.2	200.5	0	-0.0416666666666661
33	20	3	14.55	145	0	-0.0416666666666661
33	21	3	16.72	0	0	-1.04166666666667
33	22	3	18.17	744.56	0	1.95833333333333
33	23	3	19.5	20.3	0	-2.04166666666667
33	24	3	21.67	89	0	-7.04166666666667
34	1	1	8.78	505.3244	1	2.76190476190476
34	2	1	11.02	0	1	1.76190476190476
34	3	1	12.13	0	1	1.76190476190476
34	4	1	14.78	173.25	1	1.76190476190476
34	5	1	15.93	17.2	1	0.761904761904763
34	6	1	17.38	145	1	3.76190476190476
34	7	1	20.82	0	1	-2.23809523809524
34	8	1	21.28	772.75	1	-1.23809523809524
34	9	2	8.45	10.8	1	-1.23809523809524
34	10	2	10.35	280.3668445	1	0.761904761904763
34	11	2	11.97	133.8	1	0.761904761904763
34	12	2	15.22	463.95	1	0.761904761904763
34	13	2	16.37	0	1	-1.23809523809524
34	14	2	18.02	915.2	1	-2.23809523809524
34	15	2	21.93	0	1	-2.23809523809524
34	16	3	8.97	0	1	0.761904761904763
34	17	3	11.8	655.3	1	0.761904761904763
34	18	3	14.73	0	1	-2.23809523809524
34	19	3	18.38	513.78	1	-1.23809523809524
34	20	3	20.33	0	1	-1.23809523809524
34	21	3	21.1	0	1	-1.23809523809524
35	1	1	9.02	406.08	1	3.90909090909091
35	2	1	9.87	282.5	1	3.90909090909091
35	3	1	12.15	0	1	1.90909090909091
35	4	1	13.65	0	1	1.90909090909091
35	5	1	15.23	114.18	1	1.90909090909091
35	6	1	17.32	282.2	1	2.90909090909091
35	7	1	20.07	6	1	-5.09090909090909
35	8	1	21.27	0	1	-6.09090909090909
35	9	2	10.08	3	1	2.90909090909091
35	10	2	11.22	275.008	1	3.90909090909091
35	11	2	12.97	3	1	3.90909090909091
35	12	2	16.12	114.18	1	-1.09090909090909
35	13	2	17.15	244.6	1	2.90909090909091
35	14	2	20.08	183	1	-1.09090909090909
35	15	2	21.08	0	1	-4.09090909090909
35	16	3	8.45	0	1	-1.09090909090909
35	17	3	11.78	0	1	3.90909090909091
35	18	3	13.35	1045.4	1	-2.09090909090909
35	19	3	14.1	20	1	-2.09090909090909
35	20	3	18.78	278.78	1	-1.09090909090909
35	21	3	19.75	0	1	-5.09090909090909
35	22	3	21.13	0	1	-5.09090909090909
36	1	1	10.92	2.25	1	-2
36	2	1	21.83	40.8	1	0
36	3	2	14.77	0	1	-2
36	4	2	15.85	238.35	1	2
36	5	2	17.93	0	1	-2
36	6	3	10.92	0	1	3
36	7	3	13.5	769.4	1	2
36	8	3	16.6	0	1	2
36	9	3	17.62	0	1	-3
37	1	1	9.15	0	0	0.217391304347826
37	2	1	10.82	132.5	0	0.217391304347826
37	3	1	12.92	965.1	0	0.217391304347826
37	4	1	14.8	0	0	0.217391304347826
37	5	1	16.33	94	0	-0.782608695652174
37	6	1	18.23	276.85	0	2.21739130434783
37	7	1	20.18	545.45	0	0.217391304347826
37	8	1	21.62	0	0	-2.78260869565217
37	9	2	8.45	0	0	0.217391304347826
37	10	2	10.7	0	0	0.217391304347826
37	11	2	12.62	0	0	0.217391304347826
37	12	2	14	1371.38	0	0.217391304347826
37	13	2	16.63	0	0	1.21739130434783
37	14	2	18.48	757.65	0	0.217391304347826
37	15	2	20.12	0	0	0.217391304347826
37	16	2	21.3	95	0	-0.782608695652174
37	17	3	9.23	115.5	0	-0.782608695652174
37	18	3	11.07	118.8	0	0.217391304347826
37	19	3	14.48	0	0	-3.78260869565217
37	20	3	16.2	118.8	0	1.21739130434783
37	21	3	18.35	1281.6	0	-0.782608695652174
37	22	3	19.58	145	0	1.21739130434783
37	23	3	21.22	85.8	0	1.21739130434783
38	1	1	9.37	0	1	0.458333333333334
38	2	1	11.07	99	1	0.458333333333334
38	3	1	12.45	0	1	0.458333333333334
38	4	1	14.37	0	1	0.458333333333334
38	5	1	15.68	929.3	1	0.458333333333334
38	6	1	17.97	173.7	1	-0.541666666666666
38	7	1	19.05	0	1	-0.541666666666666
38	8	1	21.87	76.5	1	0.458333333333334
38	9	2	8.58	203.85	1	-2.54166666666667
38	10	2	10.88	0	1	0.458333333333334
38	11	2	11.97	0	1	0.458333333333334
38	12	2	13.93	528.68	1	0.458333333333334
38	13	2	16.23	86.85	1	0.458333333333334
38	14	2	18.47	207.9	1	-0.541666666666666
38	15	2	19.88	0	1	-0.541666666666666
38	16	2	21.98	0	1	-0.541666666666666
38	17	3	8.55	307.9	1	-1.54166666666667
38	18	3	10.62	144	1	1.45833333333333
38	19	3	12.57	360.68	1	0.458333333333334
38	20	3	14.92	0	1	-0.541666666666666
38	21	3	16.33	160.8	1	0.458333333333334
38	22	3	17.58	235.4	1	0.458333333333334
38	23	3	19.62	0	1	0.458333333333334
38	24	3	21.05	0	1	-0.541666666666666
39	1	1	8.92	0	0	-5.58333333333333
39	2	1	11.22	154	0	-1.58333333333333
39	3	1	13.47	0	0	1.41666666666667
39	4	1	14.33	462.94	0	1.41666666666667
39	5	1	16.02	0	0	0.416666666666666
39	6	1	18.33	0	0	-0.583333333333334
39	7	1	20.22	948.26	0	-0.583333333333334
39	8	1	21.72	0	0	-0.583333333333334
39	9	2	8.75	12.5	0	-3.58333333333333
39	10	2	11.47	279.35	0	-0.583333333333334
39	11	2	13.18	0	0	0.416666666666666
39	12	2	15.35	74.6	0	0.416666666666666
39	13	2	16.58	0	0	0.416666666666666
39	14	2	17.98	245.25	0	0.416666666666666
39	15	2	19.95	2146.958125	0	-1.58333333333333
39	16	2	21.6	0	0	-0.583333333333334
39	17	3	9.48	490.5	0	-3.58333333333333
39	18	3	11.33	0	0	2.41666666666667
39	19	3	12.48	99	0	2.41666666666667
39	20	3	14.43	99	0	2.41666666666667
39	21	3	16.58	269.9	0	2.41666666666667
39	22	3	18.33	1553.72	0	1.41666666666667
39	23	3	20.13	0	0	1.41666666666667
39	24	3	21.67	0	0	1.41666666666667
40	1	1	11.67	347.893	1	-2.65
40	2	1	13.48	0	1	0.35
40	3	1	15.33	538.935263157895	1	2.35
40	4	1	18.47	753.96	1	3.35
40	5	1	20.02	0	1	-4.65
40	6	1	21.55	71.6	1	-0.65
40	7	2	10.22	384.9426	1	-7.65
40	8	2	13	0	1	3.35
40	9	2	14.28	0	1	3.35
40	10	2	16.25	145	1	1.35
40	11	2	18.23	0	1	0.35
40	12	2	19.65	0	1	2.35
40	13	2	20.97	976.33	1	2.35
40	14	3	11.63	0	1	1.35
40	15	3	12.97	0	1	2.35
40	16	3	14.75	544.2	1	1.35
40	17	3	15.97	0	1	2.35
40	18	3	17.9	3	1	-4.65
40	19	3	20.05	0	1	-3.65
40	20	3	21.32	1462.22	1	-2.65
41	1	1	8.25	0	0	-6.42857142857143
41	2	1	10.48	843.88	0	-4.42857142857143
41	3	1	12.95	0	0	-2.42857142857143
41	4	1	13.98	0	0	1.57142857142857
41	5	1	15.22	291.5	0	-1.42857142857143
41	6	1	17.25	0	0	-2.42857142857143
41	7	1	19	1042.5	0	0.571428571428571
41	8	2	9.67	0	0	-1.42857142857143
41	9	2	10.78	0	0	-1.42857142857143
41	10	2	12	297.65	0	0.571428571428571
41	11	2	13.33	1065.48	0	1.57142857142857
41	12	2	16.7	291.2	0	0.571428571428571
41	13	2	18.32	0	0	1.57142857142857
41	14	2	19.98	324	0	2.57142857142857
41	15	2	21.63	396	0	2.57142857142857
41	16	3	9.58	0	0	2.57142857142857
41	17	3	10.6	4	0	1.57142857142857
41	18	3	12.5	198	0	1.57142857142857
41	19	3	16.78	640	0	-0.428571428571429
41	20	3	20.23	0	0	2.57142857142857
41	21	3	21.98	0	0	0.571428571428571
42	1	1	9.27	332.1	0	0.571428571428571
42	2	1	11.45	0	0	-1.42857142857143
42	3	1	12.5	699.05	0	-0.428571428571429
42	4	1	14	0	0	-2.42857142857143
42	5	1	16.65	1080.2	0	2.57142857142857
42	6	1	18.05	0	0	1.57142857142857
42	7	1	19.98	92.4	0	0.571428571428571
42	8	1	21.98	0	0	0.571428571428571
42	9	2	9.67	43	0	-1.42857142857143
42	10	2	11.28	504	0	-1.42857142857143
42	11	2	13.88	0	0	0.571428571428571
42	12	2	16.55	114	0	-3.42857142857143
42	13	2	17.9	0	0	0.571428571428571
42	14	2	18.97	414.78	0	0.571428571428571
42	15	3	8.92	1574.8	0	-1.42857142857143
42	16	3	11.35	0	0	-0.428571428571429
42	17	3	12.47	1306.9	0	-0.428571428571429
42	18	3	14.83	0	0	-0.428571428571429
42	19	3	16.18	0	0	2.57142857142857
42	20	3	17.3	0	0	-0.428571428571429
42	21	3	21.97	1042.5	0	3.57142857142857
43	1	1	12.32	444.03	0	1.45
43	2	1	15.58	39.6	0	-2.55
43	3	1	18.05	803.85	0	-1.55
43	4	1	19.1	236	0	-0.550000000000001
43	5	1	21.83	0	0	-1.55
43	6	2	9.22	515.65	0	0.449999999999999
43	7	2	11.12	0	0	2.45
43	8	2	12.63	1421.05	0
43	9	2	14.55	0	0	2.45
43	10	2	16.12	0	0	0.449999999999999
43	11	2	17.25	0	0	1.45
43	12	2	19.43	480.4	0	-0.550000000000001
43	13	2	21.57	1.5	0	-2.55
43	14	3	9.4	0	0	1.45
43	15	3	10.58	735.38	0	1.45
43	16	3	12.32	0	0	2.45
43	17	3	14.67	0.6	0	2.45
43	18	3	16.35	0	0	-1.55
43	19	3	17.13	174	0	-0.550000000000001
43	20	3	19.13	983.7	0	-2.55
43	21	3	21.1	0	0	-2.55
44	1	1	8.52	88	1	-3.27272727272727
44	2	1	11.3	374.68	1	-4.27272727272727
44	3	1	13.22	0	1	-2.27272727272727
44	4	1	14.37	473	1	-1.27272727272727
44	5	1	15.57	1.5	1	2.72727272727273
44	6	1	17.92	616.26	1	1.72727272727273
44	7	1	20.1	0	1	1.72727272727273
44	8	1	21.83	0	1	-0.272727272727273
44	9	2	8.43	0	1	-4.27272727272727
44	10	2	11.1	162.45	1	1.72727272727273
44	11	2	12.52	0	1	0.727272727272727
44	12	2	13.88	49.5	1	2.72727272727273
44	13	2	15.25	415	1	3.72727272727273
44	14	2	16.78	0	1	0.727272727272727
44	15	2	19.57	1037.13	1	1.72727272727273
44	16	3	8.42	319.7	1	-4.27272727272727
44	17	3	11.15	0	1	-0.272727272727273
44	18	3	12.3	383.4	1	0.727272727272727
44	19	3	13.37	0	1	2.72727272727273
44	20	3	16.53	0	1	-0.272727272727273
44	21	3	19.23	198.9	1	-1.27272727272727
44	22	3	20.98	93	1	0.727272727272727
45	1	1	8.22	49.5	1	0.952380952380953
45	2	1	11.72	0	1	2.95238095238095
45	3	1	12.37	561	1	-1.04761904761905
45	4	1	15.17	0	1	3.95238095238095
45	5	1	16.5	0	1	-0.0476190476190474
45	6	1	18.05	438.025	1	-1.04761904761905
45	7	1	19.18	0	1	0.952380952380953
45	8	2	8.58	74.25	1	-1.04761904761905
45	9	2	11.1	770.75	1	-2.04761904761905
45	10	2	12.72	4.5	1	-2.04761904761905
45	11	2	14.7	0	1	0.952380952380953
45	12	2	16.42	0	1	-2.04761904761905
45	13	2	18.03	972.615	1	-4.04761904761905
45	14	2	19.1	535	1	-3.04761904761905
45	15	3	9.48	627.5	1	-0.0476190476190474
45	16	3	11.25	0	1	2.95238095238095
45	17	3	13.15	196.5	1	3.95238095238095
45	18	3	14.62	278.7	1	-1.04761904761905
45	19	3	15.68	442.64	1	-2.04761904761905
45	20	3	16.87	276.65	1	-0.0476190476190474
45	21	3	18.65	0	1	2.95238095238095
46	1	1	10.7	50.72	1	-1.54545454545454
46	2	1	12.35	260.1	1	-0.545454545454545
46	3	1	14.8	928.31	1	-0.545454545454545
46	4	1	16.22	262	1	-1.54545454545454
46	5	1	17.38	0	1	-1.54545454545454
46	6	1	19.9	642.8178	1	-2.54545454545454
46	7	1	20.97	0	1	-2.54545454545454
46	8	2	9.3	0	1	0.454545454545455
46	9	2	10.98	3.75	1	1.45454545454546
46	10	2	11.87	174.73	1	3.45454545454546
46	11	2	15.12	0	1	-0.545454545454545
46	12	2	16.02	203.1166	1	-1.54545454545454
46	13	2	17.33	761.237	1	-2.54545454545454
46	14	2	21.92	0	1	0.454545454545455
46	15	3	8.97	1326	1	4.45454545454546
46	16	3	10.37	0	1	0.454545454545455
46	17	3	11.73	73.8	1	2.45454545454546
46	18	3	13.27	499.05	1	3.45454545454546
46	19	3	16.53	3	1	3.45454545454546
46	20	3	17.87	0	1	0.454545454545455
46	21	3	19.15	673.15	1	-2.54545454545454
46	22	3	21.85	0	1	-2.54545454545454
47	1	1	8.6	104.8	1	0.0500000000000007
47	2	1	10.63	0	1	1.05
47	3	1	12.95	590.5	1	2.05
47	4	1	14.92	0	1	1.05
47	5	1	17.05	0	1	3.05
47	6	1	17.97	0	1	1.05
47	7	1	19.97	288	1	2.05
47	8	1	21.18	0	1	4.05
47	9	2	8.57	0	1	1.05
47	10	2	10.48	0	1	1.05
47	11	2	12.02	478.99	1	0.0500000000000007
47	12	2	13.62	0	1	-0.949999999999999
47	13	2	18.45	0	1	-0.949999999999999
47	14	2	19.55	651.47	1	-2.95
47	15	2	21.88	0	1	-1.95
47	16	3	9.48	229.2	1	-0.949999999999999
47	17	3	14.33	87	1	-2.95
47	18	3	15.85	0	1	0.0500000000000007
47	19	3	17.02	0	1	1.05
47	20	3	21.92	0	1	-6.95
48	1	1	8.03	666.64	1	-4.75
48	2	1	10.72	8.9	1	1.25
48	3	1	12.5	0	1	1.25
48	4	1	14.28	321.74	1	1.25
48	5	1	16.58	4	1	2.25
48	6	1	18.48	300	1	-0.75
48	7	1	19.6	857.11	1	0.25
48	8	1	21.92	0	1	-0.75
48	9	2	8.73	3	1	1.25
48	10	2	10.38	87.875	1	2.25
48	11	2	11.67	0	1	1.25
48	12	2	14.8	12.75	1	-2.75
48	13	2	16	4	1	1.25
48	14	2	18.13	0	1	-0.75
48	15	2	19.38	654.66	1	0.25
48	16	2	21.68	569.7	1	-1.75
48	17	3	8.77	343.15	1	-1.75
48	18	3	10.47	154.7	1	-1.75
48	19	3	12.35	430.65	1	-0.75
48	20	3	14.32	13.15	1	0.25
48	21	3	16.7	0	1	1.25
48	22	3	17.92	237.15	1	-1.75
48	23	3	19.75	133	1	1.25
48	24	3	20.68	929.73	1	2.25
49	1	1	8.17	45.75	1	2.04347826086956
49	2	1	11	49.5	1	0.0434782608695645
49	3	1	12.1	40	1	0.0434782608695645
49	4	1	13.72	451.22	1	2.04347826086956
49	5	1	15.53	49.5	1	-1.95652173913044
49	6	1	17.87	0	1	2.04347826086956
49	7	1	18.93	308.345433333333	1	4.04347826086956
49	8	1	20.77	381.99	1	-2.95652173913044
49	9	2	9.6	156.225	1	1.04347826086956
49	10	2	10.77	0	1	1.04347826086956
49	11	2	13.1	672.3411875	1	-0.956521739130435
49	12	2	14.47	111.8	1	1.04347826086956
49	13	2	16.47	1.5	1	-0.956521739130435
49	14	2	18.28	58.5	1	-2.95652173913044
49	15	2	19.82	622.59	1	-1.95652173913044
49	16	2	21.52	0	1	-2.95652173913044
49	17	3	9.98	386.8	1	2.04347826086956
49	18	3	12.67	910.33	1	2.04347826086956
49	19	3	14.32	3	1	-2.95652173913044
49	20	3	16.47	0	1	1.04347826086956
49	21	3	17.57	0	1	-2.95652173913044
49	22	3	18.73	109.5	1	1.04347826086956
49	23	3	21.67	0	1	1.04347826086956
50	1	1	10	262	1	-1.6
50	2	1	18.13	350.1	1	-4.6
50	3	1	19.92	855.5	1	-1.6
50	4	1	21.33	0	1	-0.6
50	5	2	8.68	0	1	0.4
50	6	2	16.17	273.1	1
50	7	2	17.78	0	1	-1.6
50	8	2	19.3	0	1	0.4
50	9	2	20.62	684.4	1	2.4
50	10	3	9.48	745.95	1	0.4
50	11	3	11.73	0	1	3.4
50	12	3	15.1	0	1	2.4
50	13	3	15.88	0	1	1.4
50	14	3	17.42	0	1	-0.6
50	15	3	18.88	905	1	0.4
50	16	3	21.77	0	1	-0.6
51	1	1	10.17	166.31	1	1.56521739130435
51	2	1	12.33	518.675	1	4.56521739130435
51	3	1	13.35	0	1	-1.43478260869565
51	4	1	15.8	125.625	1	3.56521739130435
51	5	1	17.58	266.115	1	-2.43478260869565
51	6	1	18.98	0	1	-1.43478260869565
51	7	1	21.42	0	1	-3.43478260869565
51	8	2	8.3	0	1	4.56521739130435
51	9	2	9.88	71.24	1	4.56521739130435
51	10	2	12.4	506.664	1	5.56521739130435
51	11	2	13.32	0	1	0.565217391304348
51	12	2	16.47	756.21	1	3.56521739130435
51	13	2	18.17	0	1	-1.43478260869565
51	14	2	19.77	328.255	1	-1.43478260869565
51	15	2	20.87	0	1	-5.43478260869565
51	16	3	8.15	0	1	-5.43478260869565
51	17	3	11.48	0	1	-1.43478260869565
51	18	3	13.23	995.19	1	2.56521739130435
51	19	3	14.32	0	1	1.56521739130435
51	20	3	16.42	210.9	1	-2.43478260869565
51	21	3	17.93	44.1	1	-0.434782608695652
51	22	3	20.22	19.65	1	-1.43478260869565
51	23	3	21.28	0	1	-4.43478260869565
52	1	1	8.1	0	0	-0.375
52	2	1	10.3	0	0	0.625
52	3	1	13.22	4.5	0	0.625
52	4	1	14.63	0	0	-1.375
52	5	1	16.07	0	0	2.625
52	6	1	18.3	0	0	3.625
52	7	1	19.88	1318.73	0	-0.375
52	8	1	21.72	0	0	-2.375
52	9	2	9.58	0	0	-2.375
52	10	2	11.22	645.98	0	0.625
52	11	2	12.93	0	0	0.625
52	12	2	14.93	0	0	0.625
52	13	2	16.28	0	0	2.625
52	14	2	17.17	435.125	0	-0.375
52	15	2	20.18	0	0	-1.375
52	16	2	21.35	1424.78	0	-1.375
52	17	3	9.15	0	0	-0.375
52	18	3	11.3	1074.3	0	-0.375
52	19	3	12.42	0	0	1.625
52	20	3	13.95	592	0	1.625
52	21	3	16.02	0	0	1.625
52	22	3	17.27	0	0	-0.375
52	23	3	20.22	61.44	0	-2.375
52	24	3	21.67	43	0	-3.375
53	1	1	8.53	35.4	1	0.736842105263158
53	2	1	10.78	279.78	1	0.736842105263158
53	3	1	12.33	0	1	1.73684210526316
53	4	1	13.97	42	1	2.73684210526316
53	5	1	16.77	91.5	1	-0.263157894736842
53	6	2	9.83	0	1	0.736842105263158
53	7	2	11.17	257.55	1	1.73684210526316
53	8	2	13.53	282.06	1	-2.26315789473684
53	9	2	16.63	91.5	1	1.73684210526316
53	10	2	17.93	3	1	-1.26315789473684
53	11	2	20.4	0	1	0.736842105263158
53	12	2	21.65	0	1	-0.263157894736842
53	13	3	11.22	559.75	1	-2.26315789473684
53	14	3	12.75	0	1	-0.263157894736842
53	15	3	14.47	194.5	1	0.736842105263158
53	16	3	16.2	0	1	-2.26315789473684
53	17	3	17.62	527.1	1	-0.263157894736842
53	18	3	20.17	26.4	1	-1.26315789473684
53	19	3	21.9	0	1	-1.26315789473684
54	1	1	12.52	262	0	0.916666666666666
54	2	1	15.45	1994.75	0
54	3	1	19.25	1500	0	-0.0833333333333339
54	4	1	21.93	3	0	-0.0833333333333339
54	5	2	12.92	1376.7	0	-2.08333333333333
54	6	2	14.85	0	0	0.916666666666666
54	7	2	17.73	0	0	-1.08333333333333
54	8	2	21.47	0	0	-1.08333333333333
54	9	3	8.72	238.5	0	-1.08333333333333
54	10	3	10.38	257.55	0	0.916666666666666
54	11	3	16.72	0	0	0.916666666666666
54	12	3	17.98	287.2	0	0.916666666666666
54	13	3	21.52	0	0	0.916666666666666
55	1	1	8.83	0	1	1.17391304347826
55	2	1	10.27	0	1	0.173913043478261
55	3	1	11.82	690.6	1	-1.82608695652174
55	4	1	13.47	0	1	-0.826086956521739
55	5	1	15.77	0	1	-2.82608695652174
55	6	1	18.03	620.08	1	1.17391304347826
55	7	1	19.83	197.7	1	3.17391304347826
55	8	1	21.53	0	1	1.17391304347826
55	9	2	9.68	0	1	1.17391304347826
55	10	2	10.75	628	1	1.17391304347826
55	11	2	12.57	256.92	1	1.17391304347826
55	12	2	13.8	0	1	0.173913043478261
55	13	2	15.42	164.45	1	-0.826086956521739
55	14	2	17.03	896.98	1	-0.826086956521739
55	15	2	18.92	0	1	-0.826086956521739
55	16	2	20.57	0	1	-2.82608695652174
55	17	3	8.4	230.4	1	-1.82608695652174
55	18	3	10.42	456.7	1	-1.82608695652174
55	19	3	13.07	0	1	2.17391304347826
55	20	3	14.68	0	1	3.17391304347826
55	21	3	16.25	2.5	1	0.173913043478261
55	22	3	17.77	767.73	1	1.17391304347826
55	23	3	20.12	0	1	-2.82608695652174
56	1	1	8.38	91.5	0	-1.73684210526316
56	2	1	12.83	0	0	3.26315789473684
56	3	1	14.1	0	0	-0.736842105263158
56	4	1	16.72	0	0	-0.736842105263158
56	5	1	17.88	40.5	0	0.263157894736842
56	6	1	19.35	586.24	0	-0.736842105263158
56	7	1	20.52	103.5	0	0.263157894736842
56	8	2	11.3	411	0	0.263157894736842
56	9	2	12.57	3	0	-0.736842105263158
56	10	2	15.13	0	0	-0.736842105263158
56	11	2	15.82	3	0	0.263157894736842
56	12	2	17.27	0	0	-0.736842105263158
56	13	2	20.08	163.1	0	1.26315789473684
56	14	2	21.52	102	0
56	15	3	9.47	871.8	0	0.263157894736842
56	16	3	11.22	0	0	-0.736842105263158
56	17	3	13.03	755.65	0	0.263157894736842
56	18	3	14.7	0	0	2.26315789473684
56	19	3	16.63	1165.87	0	-2.73684210526316
56	20	3	18.33	817.05	0	1.26315789473684
57	1	1	13.23	0	0	-2.71428571428571
57	2	1	14.67	80.25	0	-0.714285714285714
57	3	1	16.3	0	0	-3.71428571428571
57	4	1	17.68	0	0	1.28571428571429
57	5	1	19.52	390	0	1.28571428571429
57	6	1	21.7	0	0	-6.71428571428571
57	7	2	9.05	35.5	0	-0.714285714285714
57	8	2	10.52	0	0	0.285714285714286
57	9	2	13.07	0	0	2.28571428571429
57	10	2	14.8	0	0	-2.71428571428571
57	11	2	16.32	3	0	-3.71428571428571
57	12	2	18.22	443.55	0	1.28571428571429
57	13	2	19.88	262	0	0.285714285714286
57	14	2	21.38	0	0	2.28571428571429
57	15	3	11.47	0	0	2.28571428571429
57	16	3	13.1	236.75	0	2.28571428571429
57	17	3	14.38	35.5	0	2.28571428571429
57	18	3	15.95	0	0	2.28571428571429
57	19	3	17.17	0	0	2.28571428571429
57	20	3	19.9	0	0	0.285714285714286
57	21	3	21.13	0	0	0.285714285714286
58	1	1	8.1	662.15	0
58	2	1	10.17	210.8	0	0.285714285714286
58	3	1	13.18	0	0	-2.71428571428571
58	4	1	14.57	49.25	0	-0.714285714285714
58	5	1	15.97	330.1	0	1.28571428571429
58	6	1	17.93	0	0	1.28571428571429
58	7	1	19.33	965	0	0.285714285714286
58	8	1	20.73	0	0	1.28571428571429
58	9	2	9.7	0	0	1.28571428571429
58	10	2	11.43	343.35	0	1.28571428571429
58	11	2	12.9	0	0	1.28571428571429
58	12	2	14.18	600.65	0	-2.71428571428571
58	13	2	17.48	924.5	0	-1.71428571428571
58	14	2	19.43	0	0	3.28571428571429
58	15	2	21.35	316.8	0	-2.71428571428571
58	16	3	9.15	186.25	0	-1.71428571428571
58	17	3	10.92	615.5	0	1.28571428571429
58	18	3	14.52	0	0	1.28571428571429
58	19	3	15.77	0	0	-0.714285714285714
58	20	3	17.77	1413.2	0	1.28571428571429
58	21	3	20.07	0	0	-1.71428571428571
58	22	3	21.93	0	0	-0.714285714285714
59	1	1	9.5	2	0	-0.117647058823529
59	2	1	10.85	1129.1	0	-0.117647058823529
59	3	1	14.98	1037.4	0	-2.11764705882353
59	4	1	16.7	0	0	-2.11764705882353
59	5	1	19.45	5	0	-3.11764705882353
59	6	2	9.28	0	0	-0.117647058823529
59	7	2	10.4	1188.62	0	-1.11764705882353
59	8	2	12.3	501	0	-0.117647058823529
59	9	2	16.07	0	0	-0.117647058823529
59	10	2	17.98	0	0	1.88235294117647
59	11	2	19.58	0	0	-0.117647058823529
59	12	3	10.53	20.3	0	0.882352941176471
59	13	3	11.83	150.8	0	-0.117647058823529
59	14	3	14.5	20.3	0	1.88235294117647
59	15	3	16.22	471.5	0	1.88235294117647
59	16	3	17.48	0	0	1.88235294117647
59	17	3	19.15	0	0	0.882352941176471
60	1	1	8.3	494.49952	1	-2.66666666666667
60	2	1	10.65	0	1	2.33333333333333
60	3	1	12.57	584.4505	1	1.33333333333333
60	4	1	13.63	0	1	1.33333333333333
60	5	1	15.8	781.597962666667	1	1.33333333333333
60	6	1	18.4	64.5	1	0.333333333333334
60	7	1	20.02	448.59	1	-0.666666666666666
60	8	1	21.5	0	1	-3.66666666666667
60	9	2	8.42	0	1	0.333333333333334
60	10	2	10.25	0	1	1.33333333333333
60	11	2	12.77	0	1	1.33333333333333
60	12	2	14.62	0	1	1.33333333333333
60	13	2	15.37	0	1	0.333333333333334
60	14	2	17	441.8	1	-1.66666666666667
60	15	2	19.55	0	1	0.333333333333334
60	16	2	21.77	48.6	1	-2.66666666666667
60	17	3	9.13	0	1	2.33333333333333
60	18	3	10.7	0	1	1.33333333333333
60	19	3	12.07	0	1	1.33333333333333
60	20	3	14.9	0	1	-0.666666666666666
60	21	3	15.9	622.8	1	0.333333333333334
60	22	3	17.68	843.471428571429	1	1.33333333333333
60	23	3	19.8	113.1	1	-2.66666666666667
60	24	3	21.8	0	1	-3.66666666666667
61	1	1	8.48	301.94	1	3.21739130434783
61	2	1	10.12	0	1	2.21739130434783
61	3	1	13.02	1018.95	1	3.21739130434783
61	4	1	14.4	16	1	-2.78260869565217
61	5	1	15.9	0	1	0.217391304347826
61	6	1	17.8	128.7	1	-1.78260869565217
61	7	1	19.83	0	1	-0.782608695652174
61	8	1	21.23	3	1	-0.782608695652174
61	9	2	8.13	0	1	-4.78260869565217
61	10	2	11.42	0	1	-4.78260869565217
61	11	2	12.38	472.065	1	-1.78260869565217
61	12	2	13.68	340	1	-1.78260869565217
61	13	2	15.28	0	1	-1.78260869565217
61	14	2	16.77	0	1	0.217391304347826
61	15	2	19.63	0	1	0.217391304347826
61	16	2	21.58	0	1	-3.78260869565217
61	17	3	9.87	210.4	1	3.21739130434783
61	18	3	11.17	0	1	3.21739130434783
61	19	3	13.2	792.73	1	3.21739130434783
61	20	3	14.85	0	1	1.21739130434783
61	21	3	16.35	0	1	0.217391304347826
61	22	3	18.53	7.4	1	2.21739130434783
61	23	3	20.03	0	1	2.21739130434783
62	1	1	8.1	423.15	1	-4.95454545454546
62	2	1	10	0	1	-1.95454545454546
62	3	1	12.28	603.44	1	-0.954545454545455
62	4	1	14.12	645.9	1	2.04545454545454
62	5	1	18.23	602	1	0.045454545454545
62	6	1	19.57	0	1	-0.954545454545455
62	7	1	21.45	0	1	-0.954545454545455
62	8	2	8.23	0	1	0.045454545454545
62	9	2	11.13	1096.6	1	0.045454545454545
62	10	2	13.13	0	1	1.04545454545454
62	11	2	14.4	0	1	1.04545454545454
62	12	2	15.62	0	1	1.04545454545454
62	13	2	17.27	927.05	1	2.04545454545454
62	14	2	20.13	908.85	1	0.045454545454545
62	15	2	21.15	0	1	-0.954545454545455
62	16	3	8.92	9.5	1	0.045454545454545
62	17	3	10.43	0	1	1.04545454545454
62	18	3	13.03	832.75	1	1.04545454545454
62	19	3	16.55	0	1	1.04545454545454
62	20	3	18.37	661.96	1	0.045454545454545
62	21	3	19.37	0	1	0.045454545454545
62	22	3	20.95	60.75	1	0.045454545454545
63	1	1	8.6	755.71	1	-4.41666666666667
63	2	1	10.8	0	1	0.583333333333334
63	3	1	12.58	1113.36	1	0.583333333333334
63	4	1	13.62	257.1	1	-0.416666666666666
63	5	1	16.37	1.5	1	-0.416666666666666
63	6	1	18.13	366.508	1	-0.416666666666666
63	7	1	20.05	0	1	0.583333333333334
63	8	1	21.8	0	1	-0.416666666666666
63	9	2	9.58	0	1	0.583333333333334
63	10	2	10.85	0	1	0.583333333333334
63	11	2	12.72	843.1	1	0.583333333333334
63	12	2	14.13	0	1	0.583333333333334
63	13	2	16.43	652.69	1	0.583333333333334
63	14	2	17.95	0	1	0.583333333333334
63	15	2	19.43	0	1	0.583333333333334
63	16	2	20.45	1045.82	1	-0.416666666666666
63	17	3	8.9	774.7	1	-1.41666666666667
63	18	3	10.43	0	1	0.583333333333334
63	19	3	12.85	303.2732	1	-0.416666666666666
63	20	3	14.22	0	1	-0.416666666666666
63	21	3	15.32	871.443	1	0.583333333333334
63	22	3	17.82	868.48	1	0.583333333333334
63	23	3	19.52	880.58	1	0.583333333333334
63	24	3	21.82	0	1	0.583333333333334
64	1	1	9.62	451.44	0	0.681818181818182
64	2	1	10.8	0	0	1.68181818181818
64	3	1	11.93	85.9	0	1.68181818181818
64	4	1	14.57	0	0	-4.31818181818182
64	5	1	15.8	0	0	-0.318181818181818
64	6	1	18.48	12.8	0	2.68181818181818
64	7	1	19.88	5.32	0	0.681818181818182
64	8	1	20.88	406.65	0	-0.318181818181818
64	9	2	8	0	0	-2.31818181818182
64	10	2	9.9	307.5	0	-0.318181818181818
64	11	2	12.95	924.718888888889	0	1.68181818181818
64	12	2	15.28	0	0	1.68181818181818
64	13	2	16.02	0	0	2.68181818181818
64	14	2	17.33	687	0	-0.318181818181818
64	15	2	19.22	0	0	-4.31818181818182
64	16	2	22.07	66	0	-0.318181818181818
64	17	3	11.18	350.37	0	0.681818181818182
64	18	3	12.92	575.679444444444	0	-1.31818181818182
64	19	3	14.65	4.8	0	1.68181818181818
64	20	3	16.23	668.159444444444	0	0.681818181818182
64	21	3	19.93	508	0	0.681818181818182
64	22	3	21.88	0	0	-3.31818181818182
65	1	1	9.53	1	1	0.583333333333334
65	2	1	10.97	62.5	1	0.583333333333334
65	3	1	12.87	522.15	1	-2.41666666666667
65	4	1	14.83	0	1	-3.41666666666667
65	5	1	16.13	0	1	-2.41666666666667
65	6	1	18.45	0	1	-1.41666666666667
65	7	1	19.7	360.356	1	-1.41666666666667
65	8	1	21.42	0	1	-3.41666666666667
65	9	2	8.65	1.5	1	0.583333333333334
65	10	2	10.02	1.5	1	0.583333333333334
65	11	2	12.12	114	1	-0.416666666666666
65	12	2	13.73	523.59	1	0.583333333333334
65	13	2	15.42	0	1	1.58333333333333
65	14	2	16.78	0	1	1.58333333333333
65	15	2	19.7	0	1	0.583333333333334
65	16	2	20.77	7.5	1	-1.41666666666667
65	17	3	8.5	0	1	-0.416666666666666
65	18	3	9.85	705.35	1	2.58333333333333
65	19	3	12.85	0	1	1.58333333333333
65	20	3	14.12	636.19	1	1.58333333333333
65	21	3	16.22	0	1	-1.41666666666667
65	22	3	17.83	0	1	2.58333333333333
65	23	3	18.95	672.028	1	2.58333333333333
65	24	3	20.58	7.5	1	0.583333333333334
66	1	1	9.27	957.5	0	-1.94117647058824
66	2	1	12.43	99	0	1.05882352941176
66	3	1	16.2	0	0
66	4	1	17.2	919.1	0	2.05882352941176
66	5	1	19.8	0	0	-5.94117647058824
66	6	1	20.77	0	0
66	7	2	9.25	0	0	-3.94117647058824
66	8	2	11.37	0	0	1.05882352941176
66	9	2	12.47	0	0	1.05882352941176
66	10	2	13.6	235.6	0	-2.94117647058824
66	11	2	15.55	95	0	2.05882352941176
66	12	2	16.77	0	0	2.05882352941176
66	13	2	20.07	348	0	2.05882352941176
66	14	3	9.28	0	0	2.05882352941176
66	15	3	10.75	0	0	-2.94117647058824
66	16	3	12.73	0	0	-1.94117647058824
66	17	3	14.73	0	0	2.05882352941176
66	18	3	16.32	546.5	0	2.05882352941176
66	19	3	17.87	0	0	2.05882352941176
67	1	1	9.68	0	1	-0.277777777777779
67	2	1	11.23	420.9	1	-1.27777777777778
67	3	1	13.1	0	1	1.72222222222222
67	4	1	14.27	0	1	3.72222222222222
67	5	1	15.78	625	1	0.722222222222221
67	6	1	17.02	988.3	1	-0.277777777777779
67	7	1	19.93	0	1	4.72222222222222
67	8	2	16.22	0	1	-1.27777777777778
67	9	2	18.32	0	1
67	10	2	19.85	244.5	1	-0.277777777777779
67	11	2	21.4	0	1	1.72222222222222
67	12	3	8.65	0	1	-2.27777777777778
67	13	3	10.63	825	1	-1.27777777777778
67	14	3	12.18	174	1	-2.27777777777778
67	15	3	13.67	0	1	-3.27777777777778
67	16	3	16.55	0	1	-1.27777777777778
67	17	3	17.82	0	1	0.722222222222221
67	18	3	19.35	0	1	0.722222222222221
67	19	3	20.9	432.18	1	-0.277777777777779
68	1	1	8.55	338.65	1	-3.17391304347826
68	2	1	11.08	0	1	-3.17391304347826
68	3	1	12.37	0	1	-2.17391304347826
68	4	1	16.67	0	1	-3.17391304347826
68	5	1	18.28	708.42	1	-0.173913043478262
68	6	1	20.07	0	1	0.826086956521738
68	7	1	21.47	0	1	1.82608695652174
68	8	2	9.1	0	1	-3.17391304347826
68	9	2	10.65	0	1	-1.17391304347826
68	10	2	12.35	901.92	1	0.826086956521738
68	11	2	13.75	0	1	-1.17391304347826
68	12	2	15.75	0	1	-1.17391304347826
68	13	2	18.45	0	1	0.826086956521738
68	14	2	19.87	628.5	1	0.826086956521738
68	15	2	21.28	0	1	0.826086956521738
68	16	3	8.7	65.3	1	1.82608695652174
68	17	3	11.23	88	1	0.826086956521738
68	18	3	12.73	0	1	1.82608695652174
68	19	3	14.02	384	1	1.82608695652174
68	20	3	15.85	0	1	0.826086956521738
68	21	3	17.25	492.5	1	1.82608695652174
68	22	3	19.08	96.8	1	1.82608695652174
68	23	3	21.58	0	1	1.82608695652174
69	1	1	12.37	88	1	-1
69	2	1	17.9	0	1	-1
69	3	1	19.37	1580.52	1	-1
69	4	1	20.8	0	1	-2
69	5	2	10.93	0	1	0
69	6	2	12.9	142.48	1	3
69	7	2	14.28	0	1	1
69	8	2	17.25	0	1	4
69	9	2	19.28	584.6	1	3
69	10	3	13.07	220.3	1	-6
70	1	1	8.48	0	0	-2.88888888888889
70	2	1	10.9	821.22	0	1.11111111111111
70	3	1	12.28	563.15	0	2.11111111111111
70	4	1	13.45	260	0	1.11111111111111
70	5	1	15.72	580.5	0	2.11111111111111
70	6	1	18.97	0	0	-3.88888888888889
70	7	1	20.72	1815.63	0	1.11111111111111
70	8	2	11.17	1947.62	0	-0.888888888888889
70	9	2	12.75	0	0	0.111111111111111
70	10	2	14.48	0	0	2.11111111111111
70	11	2	15.25	1203.4	0	1.11111111111111
70	12	2	17.13	0	0	-3.88888888888889
70	13	2	19.63	0	0	1.11111111111111
70	14	2	20.95	0	0	-1.88888888888889
70	15	3	9.65	554	0	0.111111111111111
70	16	3	13.27	221	0	0.111111111111111
70	17	3	14.92	0	0	0.111111111111111
70	18	3	21.53	0	0	1.11111111111111
71	1	1	8.25	0	0	-2.91666666666667
71	2	1	10.03	729.8	0	-2.91666666666667
71	3	1	12.52	622.49	0	1.08333333333333
71	4	1	14.62	0	0	2.08333333333333
71	5	1	15.88	310.92	0	2.08333333333333
71	6	1	18.38	267.3	0	2.08333333333333
71	7	1	20.17	432.4	0	-1.91666666666667
71	8	1	21.88	0	0	-1.91666666666667
71	9	2	8.88	0	0	2.08333333333333
71	10	2	11.53	709.303333333333	0	1.08333333333333
71	11	2	13.17	485.2202	0	2.08333333333333
71	12	2	14.95	172.05	0	1.08333333333333
71	13	2	16.67	0	0	0.0833333333333339
71	14	2	18.3	1303.39	0	0.0833333333333339
71	15	2	19.85	0	0	1.08333333333333
71	16	2	21.6	0	0	0.0833333333333339
71	17	3	9.35	353.5	0	1.08333333333333
71	18	3	11.42	409.74	0	2.08333333333333
71	19	3	12.8	43	0	0.0833333333333339
71	20	3	14.93	396.873333333333	0	0.0833333333333339
71	21	3	16.03	271.2	0	-1.91666666666667
71	22	3	18.35	787.5	0	-1.91666666666667
71	23	3	19.93	0	0	-1.91666666666667
71	24	3	21.23	0	0	-2.91666666666667
72	1	1	10.83	257.55	1	-0.714285714285714
72	2	1	12.08	572	1	1.28571428571429
72	3	1	14.78	0	1	1.28571428571429
72	4	1	18.12	511.8	1	1.28571428571429
72	5	1	18.8	159	1	2.28571428571429
72	6	1	21.6	0	1	-3.71428571428571
72	7	2	8.43	0	1	-2.71428571428571
72	8	2	11.48	0	1	-0.714285714285714
72	9	2	12.62	462	1	0.285714285714286
72	10	2	14.42	0	1	2.28571428571429
72	11	2	16.25	92	1	-0.714285714285714
72	12	2	18.1	307	1	0.285714285714286
72	13	2	19.37	441.89	1	2.28571428571429
72	14	2	21.85	0	1	2.28571428571429
72	15	3	10.38	0	1	0.285714285714286
72	16	3	12.45	0	1	-0.714285714285714
72	17	3	14.22	1107.8	1	-1.71428571428571
72	18	3	16.43	0	1	-2.71428571428571
72	19	3	18.17	0	1	1.28571428571429
72	20	3	18.92	0	1	-1.71428571428571
72	21	3	20.55	442.5	1	0.285714285714286
73	1	1	11.68	1329	1	2.80952380952381
73	2	1	14.42	0	1	0.80952380952381
73	3	1	16.22	165.6	1	-0.19047619047619
73	4	1	17.35	0	1	-1.19047619047619
73	5	1	19.62	300.9	1	-4.19047619047619
73	6	1	21.85	0	1	-0.19047619047619
73	7	2	9.32	0	1	1.80952380952381
73	8	2	10.77	269.4	1	-0.19047619047619
73	9	2	12.97	49.5	1	-0.19047619047619
73	10	2	14.87	0	1	0.80952380952381
73	11	2	17.27	523.5	1	0.80952380952381
73	12	2	19.37	0	1	0.80952380952381
73	13	2	21.53	0	1	-0.19047619047619
73	14	3	9.12	568.2	1	-3.19047619047619
73	15	3	10.58	411.6	1	0.80952380952381
73	16	3	12.18	0	1	-0.19047619047619
73	17	3	14.47	299	1	0.80952380952381
73	18	3	15.98	0	1	0.80952380952381
73	19	3	17.55	0	1	1.80952380952381
73	20	3	19.32	0	1	-0.19047619047619
73	21	3	20.43	369	1	-2.19047619047619
74	1	1	9.15	0	1	0.375
74	2	1	11	0	1	-0.625
74	3	1	12.05	430.45	1	-0.625
74	4	1	14.43	245.365	1	0.375
74	5	1	16.25	141	1	-0.625
74	6	1	17.98	644.665	1	-2.625
74	7	1	18.98	0	1	-0.625
74	8	1	21.38	0	1	-0.625
74	9	2	8.57	766.665	1	0.375
74	10	2	11.08	615.05	1	3.375
74	11	2	12.25	50.765	1	1.375
74	12	2	14.22	227.2	1	0.375
74	13	2	15.73	0	1	-0.625
74	14	2	17.97	646	1	-0.625
74	15	2	18.98	0	1	-1.625
74	16	2	20.75	94	1	-0.625
74	17	3	9.63	0	1	0.375
74	18	3	10.65	67.265	1	1.375
74	19	3	11.73	269.665	1	0.375
74	20	3	14.82	87	1	1.375
74	21	3	16.33	0	1	0.375
74	22	3	17.52	504.9	1	-0.625
74	23	3	19	114	1	-0.625
74	24	3	20.75	0	1	0.375
75	1	1	10.73	145	1	0.526315789473685
75	2	1	14.3	680.65	1	-3.47368421052632
75	3	1	17.08	1079.3	1	-0.473684210526315
75	4	1	21.85	0	1	-3.47368421052632
75	5	2	9.02	0	1	2.52631578947368
75	6	2	10.55	393.75	1	1.52631578947368
75	7	2	13.08	776.63	1	-1.47368421052632
75	8	2	14.42	0	1	-0.473684210526315
75	9	2	15.78	0	1	2.52631578947368
75	10	2	17.12	21.2	1	-0.473684210526315
75	11	2	19.63	657.65	1	1.52631578947368
75	12	2	21.45	0	1	-1.47368421052632
75	13	3	9.67	0	1	-0.473684210526315
75	14	3	10.97	0	1	-0.473684210526315
75	15	3	12.15	366.9	1	0.526315789473685
75	16	3	13.28	0	1	2.52631578947368
75	17	3	16.55	129.5	1	-0.473684210526315
75	18	3	19.82	415.4	1	1.52631578947368
75	19	3	22.12	0	1	-0.473684210526315
76	9	2	8.1	406.55	1	-0.875
76	10	2	10.78	265.55	1	1.125
76	11	2	12.72	190.95	1	2.125
76	12	2	13.97	61.5	1	2.125
76	13	2	16.53	0	1	1.125
76	14	2	18.15	0	1	5.125
76	15	2	19.27	337.7	1	-0.875
76	16	2	20.85	0	1	-0.875
76	17	3	8.85	0	1	-1.875
76	18	3	10.08	369.05	1	-2.875
76	19	3	12.03	489.56	1	-1.875
76	20	3	13.72	120.75	1	1.125
76	21	3	16.7	0	1	-2.875
76	22	3	18.17	0	1	1.125
76	23	3	20.18	341	1	0.125
76	24	3	21.25	0	1	-1.875
77	1	1	9.63	519.9	1	-1.125
77	2	1	10.67	0	1	-1.125
77	3	1	13.13	7.5	1	-0.125
77	4	1	18.5	0	1	-0.125
77	5	1	19.73	165.25	1	-1.125
77	6	1	21.73	0	1	-3.125
77	7	2	12.58	0	1	-0.125
77	8	2	14.93	234.5	1	0.875
77	9	2	17.83	649.1	1	-0.125
77	10	2	21.58	0	1	-3.125
77	11	3	11.38	0	1	-0.125
77	12	3	12.7	0	1	-0.125
77	13	3	14.3	0	1	2.875
77	14	3	15.8	366.8	1	2.875
77	15	3	17.55	0	1	1.875
77	16	3	21.7	0	1	1.875
78	1	1	8.43	0	1	1.33333333333333
78	2	1	10.12	0	1	2.33333333333333
78	3	1	12.23	1204.645	1	5.33333333333333
78	4	1	14.43	0	1	3.33333333333333
78	5	1	15.95	0	1	-4.66666666666667
78	6	1	17.75	0	1	5.33333333333333
78	7	1	19.2	0	1	3.33333333333333
78	8	1	20.77	531.46	1	1.33333333333333
78	9	2	10.98	1080.35	1	1.33333333333333
78	10	2	14.5	0	1
78	11	2	15.93	0	1	-0.666666666666666
78	12	2	17.08	0	1	-1.66666666666667
78	13	2	18.73	711.845	1	-4.66666666666667
78	14	3	8.7	0	1	-3.66666666666667
78	15	3	10.28	0	1	-6.66666666666667
78	16	3	12.08	602.55	1	-2.66666666666667
78	17	3	16.67	1084.8	1	0.333333333333334
78	18	3	19.45	0	1	0.333333333333334
78	19	3	21.28	0	1	0.333333333333334
79	1	1	11.65	838.4	0	-0.954545454545454
79	2	1	13.15	0	0	0.0454545454545459
79	3	1	14.68	0	0	0.0454545454545459
79	4	1	16.5	4.72	0	-0.954545454545454
79	5	1	18.03	855	0	-0.954545454545454
79	6	1	20.05	0	0	-1.95454545454545
79	7	1	21.12	0	0	-1.95454545454545
79	8	2	8.23	0	0	-0.954545454545454
79	9	2	10.45	0	0	0.0454545454545459
79	10	2	12.23	167.64	0	4.04545454545455
79	11	2	14.02	0	0	1.04545454545455
79	12	2	16.57	0	0	1.04545454545455
79	13	2	18.12	1564.07	0	1.04545454545455
79	14	2	19.82	0	0	-0.954545454545454
79	15	2	22.13	0	0	-0.954545454545454
79	16	3	8.82	0	0	-0.954545454545454
79	17	3	9.93	0	0	0.0454545454545459
79	18	3	12.57	0	0	-0.954545454545454
79	19	3	14.97	860.4	0	1.04545454545455
79	20	3	16.47	0	0	1.04545454545455
79	21	3	19.88	468.45	0	1.04545454545455
79	22	3	21.02	0	0	1.04545454545455
80	1	1	8.9	0	1	2.59090909090909
80	2	1	10.72	0	1	2.59090909090909
80	3	1	12.45	0	1	1.59090909090909
80	4	1	13.4	0	1	1.59090909090909
80	5	1	15.38	677.7	1	1.59090909090909
80	6	1	17.55	0	1	0.590909090909092
80	7	1	18.87	50	1	1.59090909090909
80	8	1	21.95	0	1	-4.40909090909091
80	9	2	8.85	0	1	-0.409090909090908
80	10	2	10.42	174	1	0.590909090909092
80	11	2	12.7	3	1	-0.409090909090908
80	12	2	14.4	34.8	1	-0.409090909090908
80	13	2	16.55	0	1	-0.409090909090908
80	14	2	17.68	448.32	1	-0.409090909090908
80	15	2	19.55	0	1	-1.40909090909091
80	16	2	20.6	0	1	-0.409090909090908
80	17	3	8.52	208.25	1	-6.40909090909091
80	18	3	14.58	286.45	1	1.59090909090909
80	19	3	16.25	0	1	2.59090909090909
80	20	3	17.77	0	1	-0.409090909090908
80	21	3	20.02	649.5	1	-0.409090909090908
80	22	3	21.58	195	1	-1.40909090909091
81	1	1	8.32	0	1
81	2	1	16.28	0	1	-3
81	3	1	18.35	0	1	0
81	4	1	20.25	1181.66	1	-4
81	5	1	21.97	0	1	-4
81	6	2	9	591.3	1	-2
81	7	2	11.07	262	1	0
81	8	2	12.53	735.95	1	1
81	9	2	16.82	0	1	2
81	10	2	18.82	1096.15	1	4
81	11	3	14.45	0	1	0
81	12	3	16.08	0	1	4
81	13	3	19.13	0	1	1
81	14	3	20.6	0	1	1
82	1	1	9.8	0	1	-0.952380952380953
82	2	1	11.02	19.35	1	0.0476190476190474
82	3	1	12.3	588.5	1	3.04761904761905
82	4	1	14.87	0	1	0.0476190476190474
82	5	1	16.18	162	1	0.0476190476190474
82	6	1	17.9	1002.63	1	-0.952380952380953
82	7	1	20.87	0	1	-2.95238095238095
82	8	2	10.55	49.5	1	-1.95238095238095
82	9	2	11.55	730.18	1	-3.95238095238095
82	10	2	14.42	40	1	2.04761904761905
82	11	2	16.4	0	1	-0.952380952380953
82	12	2	17.12	40	1	0.0476190476190474
82	13	2	19.67	1158.98	1	-1.95238095238095
82	14	2	21.62	0	1	-0.952380952380953
82	15	3	9.45	0	1	-0.952380952380953
82	16	3	11.45	144.44	1	2.04761904761905
82	17	3	12.5	0	1	1.04761904761905
82	18	3	14.35	764.75	1	4.04761904761905
82	19	3	15.48	0	1	2.04761904761905
82	20	3	17.03	156.51	1	2.04761904761905
82	21	3	21.12	108	1	-0.952380952380953
83	1	1	11.17	319.45	1	-0.947368421052632
83	2	1	16.4	64.5	1	1.05263157894737
83	3	1	18.77	573.5	1	-1.94736842105263
83	4	1	20.82	494.75	1	2.05263157894737
83	5	2	8.12	0	1	3.05263157894737
83	6	2	11.67	0	1	1.05263157894737
83	7	2	14.03	259.5	1	2.05263157894737
83	8	2	15.38	0	1	-0.947368421052632
83	9	2	16.97	305	1	-1.94736842105263
83	10	2	19.28	464.175	1	-0.947368421052632
83	11	2	20.75	717.49	1	2.05263157894737
83	12	3	8.1	0	1	-0.947368421052632
83	13	3	11.45	0	1	-1.94736842105263
83	14	3	12.63	726.26	1	-1.94736842105263
83	15	3	13.78	0	1	-0.947368421052632
83	16	3	16.27	0	1	1.05263157894737
83	17	3	18.05	0	1	0.0526315789473681
83	18	3	19.58	583.195	1	1.05263157894737
83	19	3	21.1	0	1	-0.947368421052632
84	1	1	8.72	2	1	-3.75
84	2	1	10.6	700.2	1	0.25
84	3	1	11.8	2	1	1.25
84	4	1	13.62	0	1	1.25
84	5	1	15.02	559.65	1	1.25
84	6	1	16.78	293	1	0.25
84	7	1	18.65	0	1	1.25
84	8	1	20.73	386.3	1	2.25
84	9	2	9.62	171.2	1	-0.75
84	10	2	11.43	2	1	0.25
84	11	2	12.95	702.9	1	-0.75
84	12	2	14.33	0	1	-0.75
84	13	2	17.55	0	1	1.25
84	14	2	19.37	880.83	1	2.25
84	15	2	20.85	99.2	1	-0.75
84	16	3	9.07	0	1	-2.75
84	17	3	9.07	0	1	-2.75
84	18	3	9.07	454	1	-2.75
84	19	3	11.33	3.5	1	0.25
84	20	3	13.27	473	1	0.25
84	21	3	14.32	427.9	1	1.25
84	22	3	16.48	576.65	1	0.25
84	23	3	20.1	507.75	1	1.25
84	24	3	21.5	416.6	1	0.25
85	1	1	9.48	335.85	1	-0.25
85	2	1	11.15	0	1	3.75
85	3	1	14.48	609.15	1	0.75
85	4	1	15.5	0	1	-0.25
85	5	1	21.5	49.6	1	-1.25
85	6	2	10.52	366.9	1	-0.25
85	7	2	12.93	0	1	2.75
85	8	2	13.83	127.5	1	1.75
85	9	2	15.32	0	1	3.75
85	10	2	16.8	0	1	1.75
85	11	2	20.07	0	1	-1.25
85	12	2	21.7	0	1	-3.25
85	13	3	8.08	0	1	-3.25
85	14	3	11.55	688.5	1	0.75
85	15	3	12.83	0	1	-0.25
85	16	3	13.87	0	1	-0.25
85	17	3	16.32	169.85	1	-2.25
85	18	3	17.57	674.1	1	-2.25
85	19	3	20.3	0	1	0.75
85	20	3	21.07	0	1	-1.25
86	1	1	8.52	280.35	0	-1.95
86	2	1	10.63	156	0	2.05
86	3	1	11.52	0	0	1.05
86	4	1	14.63	162.9	0	-2.95
86	5	1	15.55	561	0	-2.95
86	6	1	18.1	0	0	-2.95
86	7	1	20.33	1064.48	0	2.05
86	8	1	21.6	0	0	-0.949999999999999
86	9	2	9.88	3	0	-0.949999999999999
86	10	2	11.28	0	0	2.05
86	11	2	14.28	699.5	0	1.05
86	12	2	16.27	0	0	-2.95
86	13	2	17.38	0	0	-0.949999999999999
86	14	2	20.23	704.58	0	2.05
86	15	3	8.62	0	0	0.0500000000000007
86	16	3	11.23	1145.615	0	0.0500000000000007
86	17	3	13.05	923.56	0	-1.95
86	18	3	14.77	216	0	2.05
86	19	3	18.38	0	0	3.05
86	20	3	20.87	0	0	3.05
87	1	1	8.08	589.05	0	2.5
87	2	1	18.35	0	0	-1.5
87	3	1	20.83	0	0	1.5
87	4	2	11.62	0	0	3.5
87	5	2	13.42	443.1	0	-3.5
87	6	2	16.33	0	0	-0.5
87	7	2	19.72	707.25	0	-1.5
87	8	2	21.4	0	0	1.5
87	9	3	9.43	0	0	-0.5
87	10	3	11.4	0	0
87	11	3	12.33	0	0	0.5
87	12	3	14.6	0	0	-0.5
87	13	3	15.55	0	0	0.5
87	14	3	17.03	0	0	2.5
87	15	3	18.77	1199.975	0	-4.5
88	1	1	8.08	148.5	1	-0.875
88	2	1	10.12	0	1	1.125
88	3	1	12.55	27	1	1.125
88	4	1	14.7	363.75	1	1.125
88	5	1	15.72	435	1	-1.875
88	6	1	18.08	0	1	-3.875
88	7	1	19.62	0	1	-1.875
88	8	1	21.13	0	1	0.125
88	9	2	8.93	105	1	0.125
88	10	2	10.05	0	1	2.125
88	11	2	11.88	556.35	1	0.125
88	12	2	15.4	0	1	3.125
88	13	2	16.25	214.4	1	-2.875
88	14	2	17.95	1498.3	1	-3.875
88	15	2	19.4	0	1	1.125
88	16	2	20.77	148	1	3.125
88	17	3	9.1	81	1	-2.875
88	18	3	10.52	0	1	2.125
88	19	3	11.87	414.3	1	4.125
88	20	3	14.55	162.5	1	3.125
88	21	3	16.3	349.05	1	-0.875
88	22	3	18.62	0	1	1.125
88	23	3	20.2	2784.2	1	-2.875
88	24	3	21.78	0	1	-1.875
89	1	1	10.87	780.625	0	-1.27777777777778
89	2	1	12.25	0	0	0.722222222222221
89	3	1	13.63	719.1	0	-0.277777777777779
89	4	1	15.13	0	0	1.72222222222222
89	5	1	17.77	210	0	0.722222222222221
89	6	1	19.05	1001.1	0	0.722222222222221
89	7	1	21.07	0	0	0.722222222222221
89	8	2	8.02	210	0	-4.27777777777778
89	9	2	11.37	0	0	-1.27777777777778
89	10	2	12.48	74.25	0	-0.277777777777779
89	11	2	15.92	0	0	0.722222222222221
89	12	2	18.08	0	0	-0.277777777777779
89	13	2	19.52	1001.1	0	0.722222222222221
89	14	3	10.93	0	0	-0.277777777777779
89	15	3	12.83	1018.94	0	0.722222222222221
89	16	3	15.07	0	0	-0.277777777777779
89	17	3	16.65	0	0	0.722222222222221
89	18	3	18.82	0	0	0.722222222222221
90	1	1	8.48	0	1	-1.34782608695652
90	2	1	10.38	978.73	1	0.652173913043478
90	3	1	12.3	0	1	-2.34782608695652
90	4	1	13.47	167.85	1	1.65217391304348
90	5	1	15.98	0	1	1.65217391304348
90	6	1	17.9	493.5	1	1.65217391304348
90	7	1	19.58	308.5	1	-2.34782608695652
90	8	1	20.3	0	1	-2.34782608695652
90	9	2	9.5	0	1	0.652173913043478
90	10	2	11.37	245.55	1	-2.34782608695652
90	11	2	13.08	128.775	1	-1.34782608695652
90	12	2	14.7	380.175	1	0.652173913043478
90	13	2	16.73	0	1
90	14	2	18.27	164.2	1	0.652173913043478
90	15	2	20.17	134.9	1	0.652173913043478
90	16	2	21.6	596.33	1	1.65217391304348
90	17	3	8.57	88	1	0.652173913043478
90	18	3	10.82	0	1	0.652173913043478
90	19	3	12.1	496.5	1	1.65217391304348
90	20	3	14.63	155.2	1	3.65217391304348
90	21	3	16.08	272.4	1	0.652173913043478
90	22	3	18.35	198.72	1	-1.34782608695652
90	23	3	19.62	144	1	-2.34782608695652
90	24	3	21.5	0	1	-1.34782608695652
91	1	1	9.58	350.7	1	-0.571428571428571
91	2	1	11.05	0	1	1.42857142857143
91	3	1	12.67	433.88	1	2.42857142857143
91	4	1	13.97	0	1	4.42857142857143
91	5	1	15.82	0	1	2.42857142857143
91	6	1	18.47	520	1	1.42857142857143
91	7	1	20.23	0	1	-0.571428571428571
91	8	1	21.65	0	1	-3.57142857142857
91	9	2	8.08	0	1	-4.57142857142857
91	10	2	9.92	604.25	1	2.42857142857143
91	11	2	11.72	685.1	1	0.428571428571429
91	12	2	16.6	161.55	1	0.428571428571429
91	13	2	18.13	0	1	0.428571428571429
91	14	2	19.68	0	1	-2.57142857142857
91	15	2	20.7	0	1	-3.57142857142857
91	16	3	8.05	332.8	1	-2.57142857142857
91	17	3	9.82	0	1	0.428571428571429
91	18	3	11.77	774.4	1
91	19	3	14.27	0	1	1.42857142857143
91	20	3	16.22	510.6	1	0.428571428571429
91	21	3	17.38	0	1	1.42857142857143
91	22	3	19.1	113	1	-1.57142857142857
92	1	1	8.5	0	1	0.555555555555555
92	2	1	12.95	502.01	1	2.55555555555556
92	3	1	15.82	88	1	1.55555555555556
92	4	1	18.45	783.34	1	1.55555555555556
92	5	1	20.23	575	1	-2.44444444444444
92	6	1	21.65	0	1	-4.44444444444444
92	7	2	9.15	557.1	1	-2.44444444444444
92	8	2	10.82	0	1	2.55555555555556
92	9	2	19.98	360	1	-0.444444444444445
92	10	2	21.87	0	1	-2.44444444444444
92	11	3	9.52	235.2	1	-2.44444444444444
92	12	3	10.97	410.4	1	1.55555555555556
92	13	3	13.17	0	1	2.55555555555556
92	14	3	14.83	488.8	1	3.55555555555556
92	15	3	16.18	0	1	-0.444444444444445
92	16	3	18.37	0	1	2.55555555555556
92	17	3	19.68	1037.8	1	-1.44444444444444
92	18	3	20.97	29	1	-2.44444444444444
93	1	1	8.32	0	1	-3.40909090909091
93	2	1	10.62	0	1	-5.40909090909091
93	3	1	12.4	0	1	0.590909090909092
93	4	1	13.58	446.185	1	3.59090909090909
93	5	1	16.17	0	1	-1.40909090909091
93	6	1	17.85	90.7	1	2.59090909090909
93	7	1	20.13	0	1	3.59090909090909
93	8	1	21.47	80.625	1	0.590909090909092
93	9	2	12.48	363.15	1	1.59090909090909
93	10	2	14.72	0	1	-0.409090909090908
93	11	2	15.98	75.5	1	3.59090909090909
93	12	2	18.4	0	1	0.590909090909092
93	13	2	19.87	377.38	1	1.59090909090909
93	14	2	21.3	0	1	-0.409090909090908
93	15	3	8.62	0	1	0.590909090909092
93	16	3	10.93	0	1	-2.40909090909091
93	17	3	12.9	292.65	1	2.59090909090909
93	18	3	14.72	246.15	1	0.590909090909092
93	19	3	16.87	0	1	1.59090909090909
93	20	3	18.82	0	1	-3.40909090909091
93	21	3	19.52	286.691666666671	1	-6.40909090909091
93	22	3	21.58	172	1	-0.409090909090908
94	1	1	8.18	721.5	0	2.38095238095238
94	2	1	9.98	0	0	2.38095238095238
94	3	1	12.43	0	0	2.38095238095238
94	4	1	14.1	0	0	2.38095238095238
94	5	1	16.57	0	0	0.380952380952381
94	6	1	18.18	523.455	0	-0.619047619047619
94	7	1	20.05	198.4	0	-1.61904761904762
94	8	1	21.23	3	0	-1.61904761904762
94	9	2	8.02	0	0	-1.61904761904762
94	10	2	10.08	466.4	0	-1.61904761904762
94	11	2	11.78	0	0	1.38095238095238
94	12	2	15.58	1006.87	0	0.380952380952381
94	13	2	18.43	0	0	-0.619047619047619
94	14	2	20.07	0	0	-3.61904761904762
94	15	2	21.25	973.16	0	-0.619047619047619
94	16	3	8.05	0	0	-0.619047619047619
94	17	3	11.07	0	0	2.38095238095238
94	18	3	12.38	521.88	0	2.38095238095238
94	19	3	14.28	0	0	0.380952380952381
94	20	3	16.32	240.738	0	-2.61904761904762
94	21	3	21.23	944.12	0	-1.61904761904762
95	1	1	20.15	0	1	-5.57142857142857
95	2	2	8.85	1030.43	1	1.42857142857143
95	3	2	11.05	113.2	1	1.42857142857143
95	4	2	12.98	522.3	1	-0.571428571428571
95	5	2	14.97	0	1	-2.57142857142857
95	6	2	16.23	4.5	1	1.42857142857143
95	7	2	20.07	0	1	-3.57142857142857
95	8	2	21.78	214.4	1	-3.57142857142857
95	9	3	8.1	711.7	1	1.42857142857143
95	10	3	10.77	0	1	3.42857142857143
95	11	3	12.1	0	1	0.428571428571429
95	12	3	14.88	0	1	1.42857142857143
95	13	3	16.58	0	1	1.42857142857143
95	14	3	19.3	880.9	1	3.42857142857143
96	1	1	12.65	412.1	1	-1.71428571428571
96	2	1	14.92	108	1	0.285714285714286
96	3	1	15.95	49.5	1	0.285714285714286
96	4	1	17.4	0	1	0.285714285714286
96	5	1	20.63	19	1	0.285714285714286
96	6	2	9.15	49.5	1	-1.71428571428571
96	7	2	10.18	124	1	0.285714285714286
96	8	2	12.6	521.72	1	0.285714285714286
96	9	2	14.68	0	1	0.285714285714286
96	10	2	18.27	0	1	0.285714285714286
96	11	2	19.38	867.4	1	0.285714285714286
96	12	3	9.13	0	1	-1.71428571428571
96	13	3	10.6	83	1	0.285714285714286
96	14	3	13.55	698.8	1	2.28571428571429
97	1	1	9.5	349.98	0	-0.636363636363637
97	2	1	10.6	0	0	-0.636363636363637
97	3	1	12.62	334.5	0	2.36363636363636
97	4	1	13.82	135	0	0.363636363636363
97	5	1	15.15	883.8	0	2.36363636363636
97	6	1	18.07	0	0	-1.63636363636364
97	7	1	19.22	918	0	-0.636363636363637
97	8	1	21.55	0	0	-4.63636363636364
97	9	2	8.45	458.6	0	-2.63636363636364
97	10	2	9.83	0	0	1.36363636363636
97	11	2	11.93	615	0	2.36363636363636
97	12	2	14.35	0	0	2.36363636363636
97	13	2	16.02	297	0	-2.63636363636364
97	14	2	17.72	0	0	1.36363636363636
97	15	2	19.15	684	0	1.36363636363636
97	16	2	20.6	48.6	0	0.363636363636363
97	17	3	8.3	309.1	0	-4.63636363636364
97	18	3	10.55	0	0	-1.63636363636364
97	19	3	12.55	525.41	0	2.36363636363636
[truncated: 45 more rows]
