# Supplementary material for: Studying dietary intake in daily life through multilevel two-part modelling: a novel analytical approach and its practical application
Source: Int J Behav Nutr Phys Act. 2021 Sep 27;18:130. doi: 10.1186/s12966-021-01187-8 (PMC8477527; doi:10.1186/s12966-021-01187-8)
Supplement: Supplementary file 3 — Additional file 3. R Code. [file 12966_2021_1187_MOESM3_ESM.r]

# -------------------------------------------------------------------------------------------------- #
#                                                                                                    #
#             Studying dietary intake in daily life through multilevel two-part modelling:           #
#                      A novel analytical approach and its practical application                     #
#                                                                                                    #
#                                                                                                    #
#                                        Additional file 3. R Code                                   #
#                                                                                                    #
#                         Authors: Ruf, Neubauer, Ebner-Priemer, Reif & Matura                       #
# -------------------------------------------------------------------------------------------------- #


####------------------------------------------prepare---------------------------------------------####

# install the R-package "rstan"
# for instructions see 
# https://github.com/stan-dev/rstan/wiki/RStan-Getting-Started

# install the R-package "brms"
install.packages("brms")

# load rstan
library(rstan)
# run the recommended commands
options(mc.cores = parallel::detectCores())
rstan_options(auto_write = TRUE)

# load brms
library(brms)


#####---------------------------------------read data---------------------------------------------####

# edit path to where the dataset is located and set working directory
setwd("...")
data <- read.table("Additional file 2. Dataset of the practical example.csv", header=T, sep=",")


####----------------------------------------run models--------------------------------------------####


# Intercept Only Model----------------------------------------------------------------------------####
m.null <- 
  brm(
    bf(
      energy_intake ~ 1 + (1 |x| ID),
      hu            ~ 1 + (1 |x| ID)
    ),
    data = data,
    family = hurdle_gamma()                     
  )

# produce density and trace plots
plot(m.null)

# produce results
summary(m.null)


# Random Intercept Model with Level 2 predictor gender------------------------------------------####
m.random_intercept_Level2_predictor <-
  brm(
    bf(
      energy_intake ~ 1 + gender +  (1  | x | ID),
      hu            ~ 1 + gender +  (1  | x | ID)
    ),
    data = data,
    family = hurdle_gamma()
  )

# produce density and trace plots
plot(m.random_intercept_Level2_predictor)

# produce results
summary(m.random_intercept_Level2_predictor)


# Random Slope Model with Level-1 predictor energetic arousal (EA)------------------------------####
m.random_slope_Level1_predictor <-
  brm(
    bf(
      energy_intake ~ 1  + gender + EA + (1 + EA  | x | ID),
      hu            ~ 1  +          EA + (1 + EA  | x | ID)
    ),
    data = data,
    family = hurdle_gamma()
  )

# produce density and trace plots
plot(m.random_slope_Level1_predictor)

# produce results
summary(m.random_slope_Level1_predictor)
